1 **Serine and glycine are essential for human muscle progenitor cell population expansion**

2 Brandon J. Gheller<sup>1</sup>, Jamie E. Blum<sup>1</sup>, Erica L. Bender<sup>1</sup>, Mary E. Gheller<sup>1</sup>, Esther W. Lim<sup>2</sup>,  
3 Michal K. Handzlik<sup>2</sup>, Patrick J. Stover<sup>3</sup>, Martha S. Field<sup>1</sup>, Benjamin D. Cosgrove<sup>4</sup>, Christian M.  
4 Metallo<sup>2</sup>, and Anna E. Thalacker-Mercer\*<sup>1</sup>

5 <sup>1</sup>Division of Nutritional Sciences, Cornell University, Ithaca, NY, 14853, USA

6 <sup>2</sup>Department of Bioengineering, University of California San Diego, La Jolla, CA, 92093, USA

7 <sup>3</sup>College of Agriculture and Life Sciences, Texas A&M University, College Station, TX, 77843,  
8 USA

9 <sup>4</sup>Meining School of Biomedical Engineering, Cornell University, NY, 14853, USA

10 \*Correspondence: [aet74@cornell.edu](mailto:aet74@cornell.edu)

11

12

13

14

15

16

17

18

19

20

21

22

23

## 24 **Summary**

25           Skeletal muscle regeneration is reliant on a population of muscle specific adult stem cells  
26 (muscle progenitor cells; MPCs). During regeneration, the MPC population undergoes a transient  
27 and rapid period of population expansion, which is necessary to repair damaged myofibers and  
28 restore muscle homeostasis. Much research has focused on the age-related accumulation of  
29 negative regulators of regeneration, while the age-related decline of nutrient and metabolic  
30 determinants of the regenerative process needs examination. We hypothesized that older  
31 individuals, a population that is at risk for protein malnutrition, have diminished availability of  
32 amino acids that are necessary for MPC function. Here, we identified that levels of the non-  
33 essential amino acid serine are reduced in the skeletal muscle of healthy, older individuals.  
34 Furthermore, using stable-isotope tracing studies, we demonstrate that primary, human MPCs  
35 (*hMPCs*) exhibit a limited capacity for *de novo* biosynthesis of serine and the closely related  
36 amino acid glycine. We identified that serine and glycine are essential for *hMPC* proliferation  
37 and, therefore, population expansion. Serine and glycine were necessary to support synthesis of  
38 the intracellular antioxidant glutathione, and restriction of serine and glycine was sensed in an  
39 EIF2 $\alpha$ -dependent manner resulting in cell cycle arrest in G0/G1. In conclusion, we elucidate that,  
40 despite an absolute requirement of serine/glycine for *hMPC* proliferation, availability of serine in  
41 the skeletal muscle microenvironment is limited to the *hMPCs* of healthy older adults and is a  
42 likely underlying mechanism for impaired skeletal muscle regeneration with advancing age.

## 43 **Keywords**

44 “Satellite cell”, “Muscle stem cell,” “Metabolism, “Aging,” “Serine,” “Glycine,” “Skeletal  
45 muscle”

46

47 **Graphical Abstract**

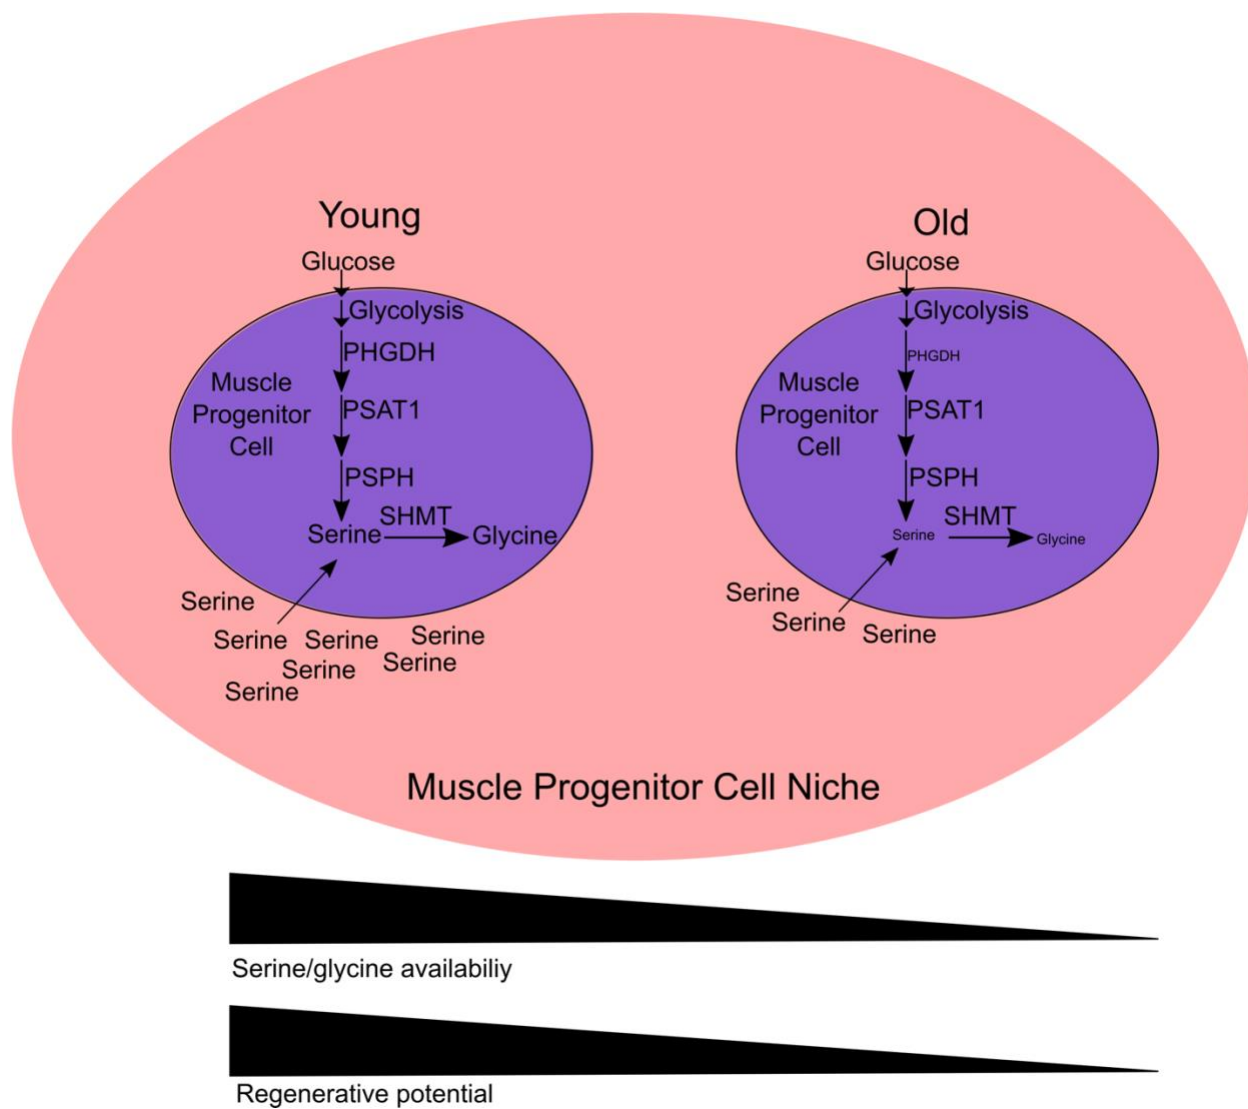

48  
49  
50  
51  
52  
53  
54  
55

## 56 **Introduction**

57           Skeletal muscle regeneration is reliant on a population of muscle specific adult stem/  
58 progenitor cells (MPCs) identified by the canonical transcription factor PAX7 (Seale et al.,  
59 2000). MPCs reside in a quiescent state, are activated after injury, and undergo a transient and  
60 rapid population expansion to provide an adequate number of cells to donate nuclei to damaged  
61 myofibers or to create nascent myofibers thereby restoring homeostasis. The muscle regeneration  
62 process markedly declines with age due to a myriad of MPC-intrinsic and -extrinsic factors that  
63 remain to be fully elucidated (Blau et al., 2015). Parabiosis experiments provide evidence that  
64 there are alterations in circulating factors and, ultimately the MPC microenvironment that occurs  
65 in aged animals which negatively affects muscle regeneration (Conboy et al., 2005). For  
66 example, when the circulation of a young and an aged mouse are joined, muscle regeneration  
67 after injury is improved in old mice compared to when the circulation of two old mice are joined  
68 (Conboy et al., 2005). Thus, restoration of the MPC microenvironment, to match that of young  
69 animals, is a potential avenue for improving skeletal muscle regeneration (Conboy et al., 2005).  
70 Follow-up to these landmark studies have largely focused on mechanisms downstream of ligand-  
71 based signaling pathways such as the Notch (Conboy et al., 2003) and Wnt (Brack et al., 2007)  
72 pathways as well as transforming growth factor beta pathways (Egerman et al., 2015; Sinha et  
73 al., 2014). Relatively little attention has focused on nutrient needs and availability to support  
74 MPC expansion. Intracellular amino acid availability has been shown to be affected by age in  
75 both a cell-intrinsic (e.g., alterations in metabolism) and -extrinsic (e.g., availability in  
76 circulation) manner (Dunn et al., 2014; Menni et al., 2013). For example, while gastrointestinal  
77 absorption of amino acids after feeding does not appear to be impaired with age (Katsanos et al.,  
78 2006; Mitchell et al., 2015), the profile of circulating amino acids is altered by age with lower

79 levels of serine, alanine, proline, tyrosine, and methionine observed in older individuals  
80 (Houtkooper et al., 2011). The importance of amino acid availability to regenerative processes is  
81 highlighted by the observation that amino acids are the primary contributors to cell mass during  
82 proliferation (Hosios et al., 2016).

83 It has been previously documented that rapid changes in MPC metabolism occur after  
84 activation (Rodgers et al., 2014), likely to support metabolic demands associated with cell  
85 division (Hosios et al., 2016). These dynamic, metabolic changes in MPCs are likely  
86 accompanied by changes in exogenous nutrient requirements, particularly those traditionally  
87 considered non-essential, as demonstrated in other proliferative cell types (Ma et al., 2017).  
88 Elucidating the metabolic requirements of MPC proliferation is essential for optimizing muscle  
89 regeneration after injury, particularly in populations with impaired regeneration.

90 We aimed to determine if an age-related decline in amino acid availability exists in the  
91 human MPC (*hMPC*) microenvironment and to determine the impact of this amino acid decline  
92 on MPC activity if it exists. In this study we identify that serine is the only amino acid that  
93 declines in *hMPC* microenvironment with advancing age, and *hMPCs* possess a limited capacity  
94 for *de novo* biosynthesis of serine and the closely related amino acid, glycine. Without  
95 exogenous serine/glycine, *hMPCs* halt proliferation and arrest in a G0/G1 state. We attribute the  
96 requirement for exogenous serine/glycine in part to the need for glutathione synthesis and  
97 determined that the G0/G1 cell cycle arrest that occurs in response to serine/glycine restriction  
98 occurs in an EIF2 $\alpha$ -dependent manner.

99

100

101

102 **Results**

103 *Serine availability and metabolism is dysregulated in aged skeletal muscle*

104 Analysis of human skeletal muscle biopsy tissue identified serine as the only measured  
105 amino acid that was reduced in the skeletal muscle of older adults compared to younger adults  
106 (**Figure 1A**). Further, chronological age and skeletal muscle serine levels were negatively  
107 correlated (**Figure 1B**). This finding is supported by a previous cross-sectional analysis of  
108 plasma from healthy, younger and older individuals which demonstrated that serine levels are  
109 reduced in older humans (Kouchiwa et al., 2012). Others have demonstrated that in frail older  
110 adults, skeletal muscle concentrations of serine and also glycine are reduced (Fazelzadeh et al.,  
111 2016). Coupled with lower circulating levels, decreased skeletal muscle serine levels suggest that  
112 after injury and myofiber disruption the *hMPC* microenvironment of aged individuals has less  
113 serine and potentially less glycine available.

114 To determine what limits serine levels in older skeletal muscle, we measured the gene  
115 expression of the serine transporter *SLCIA5* in skeletal muscle tissue homogenates from younger  
116 and older adults and found no age-related differences in expression (**Figure 1C**). We next  
117 measured gene expression of the serine synthesis enzymes, *PHGDH*, *PSAT1*, and *PSPH* in  
118 skeletal muscle tissue homogenates. *PSAT1* was the only gene that was differentially expressed  
119 in skeletal muscle with age (1.4-fold greater in older vs. younger, **Figure 1D**). Thus, it is unclear  
120 whether impaired uptake or biosynthesis limits serine levels in old muscle tissue.

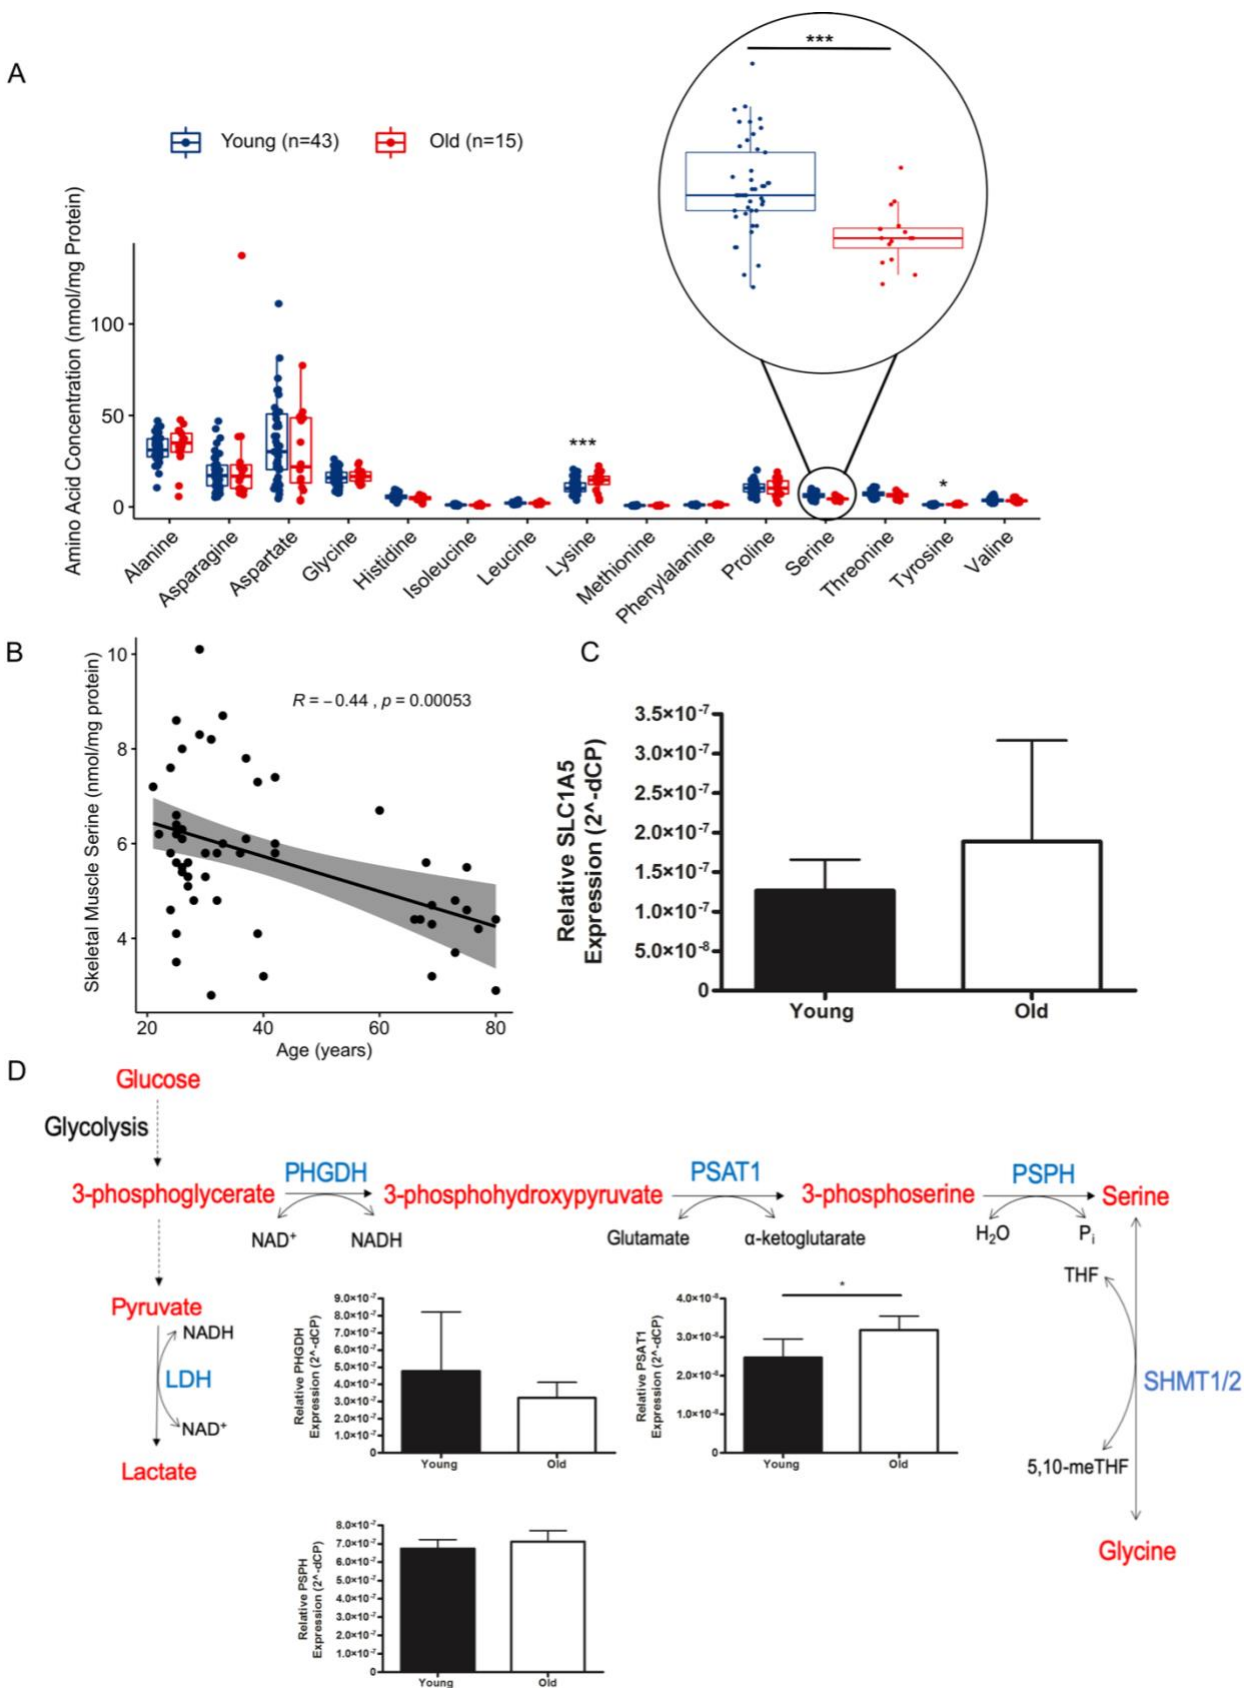

122 **Figure 1.** Serine availability and metabolism are dysregulated in aged skeletal muscle and  
123 *hMPCs*.

124 A) Analysis of amino acid levels in skeletal muscle biopsy tissue from younger (20-45y,  
125 n=43) and older (60-80y, n=15) donors identify serine as the only amino acid that  
126 decreases with age ( $P < 0.001$ ). The normalcy of the distribution of each amino acid was  
127 assessed by the Shapiro-Wilk test. If data were determined to be normally distributed,  
128 they were compared via an unpaired t-test otherwise they were compared Mann-Whitney  
129 U-test.

130 B) Skeletal muscle serine levels are negatively correlated with age (n=58,  $r = -.44$ ,  $P < 0.0001$ )  
131 based on a Pearson correlation.

132 C) Gene expression of the serine transporter SLC1A5 ( $P > 0.05$ ) between skeletal muscle  
133 tissue from younger (n=11) and older donors (n=10). Data expressed as mean  $\pm$  SD.

134 D) A schematic of the serine/glycine biosynthesis pathway. Intermediary metabolites in red.  
135 Key enzymes in blue. PHGDH, phosphoglycerate dehydrogenase; PSAT1, phosphoserine  
136 amino transferase 1; PSPH, phosphoserine phosphatase; SHMT 1/2, serine hydroxy  
137 methyltransferase1/2; LDH, lactate dehydrogenase. Gene expression of PHGDH  
138 ( $P > 0.05$ ), PSAT1 ( $P < 0.05$ ), and PSPH ( $P > 0.05$ ) between skeletal muscle tissue from  
139 younger (n=11) and older donors (n=10). Data expressed as mean  $\pm$  SD.

140 \* $P < 0.05$ .

141

142

143

144



145 *Serine and glycine are required for hMPC population expansion*

146           Because skeletal muscle serine levels and the regenerative potential of *hMPCs* decline  
147 with advancing age, and because serine has previously been shown to be the third most  
148 consumed metabolite by proliferating mammalian cells (Hosios et al., 2016) we evaluated  
149 whether serine and/or glycine impact *hMPC* population expansion. Serine and glycine were  
150 considered alone or in combination due to their interconversion through one enzymatic step via  
151 the serine hydroxymethyltransferase (SHMT, **Figure 1D**). When *hMPCs* were cultured without  
152 serine and glycine, they did not undergo population expansion (**Figure 2A**). The addition of  
153 serine (**Figure 2B**) and glycine (**Figure 2C**) individually or in combination (**Figure 2A**)  
154 increased *hMPC* population expansion in a dose-dependent manner. At high doses, glycine alone  
155 was more effective at increasing *hMPC* population expansion than serine (**Figure 2D**). This is  
156 dissimilar to what is observed in other cell types in which serine and not glycine is required for  
157 population expansion (Labuschagne et al., 2014; Ma et al., 2017). We verified that serine/glycine  
158 restriction in the media reduced intracellular serine and glycine levels (**Figure 2E**).

159           To determine the physiological relevance of the serine and glycine concentrations used *in*  
160 *vitro*, we measured plasma serine and glycine concentrations from humans under fasting, resting  
161 conditions. The levels of plasma serine were between 76 and 212  $\mu\text{mol/L}$  and plasma glycine  
162 were between 178 and 632  $\mu\text{mol/L}$  (**Figure 2F**). However, the levels of these amino acids in  
163 circulation are frequently elevated above basal values in the non-fasted state (Gannon et al.,  
164 2002; Garofalo et al., 2011) Further, it is likely, that the localized, skeletal muscle availability is  
165 also a contributing factor. The physiological relevance of the concentrations used for cell culture  
166 experiments are also supported by an analysis by Bergström *et al.* demonstrating that in younger

167 adults, skeletal muscle concentrations of serine and glycine are  $\sim 980 \mu\text{mol/L}$  and  $\sim 1330 \mu\text{mol/L}$ ,  
 168 respectively (Bergström et al., 2017).

169

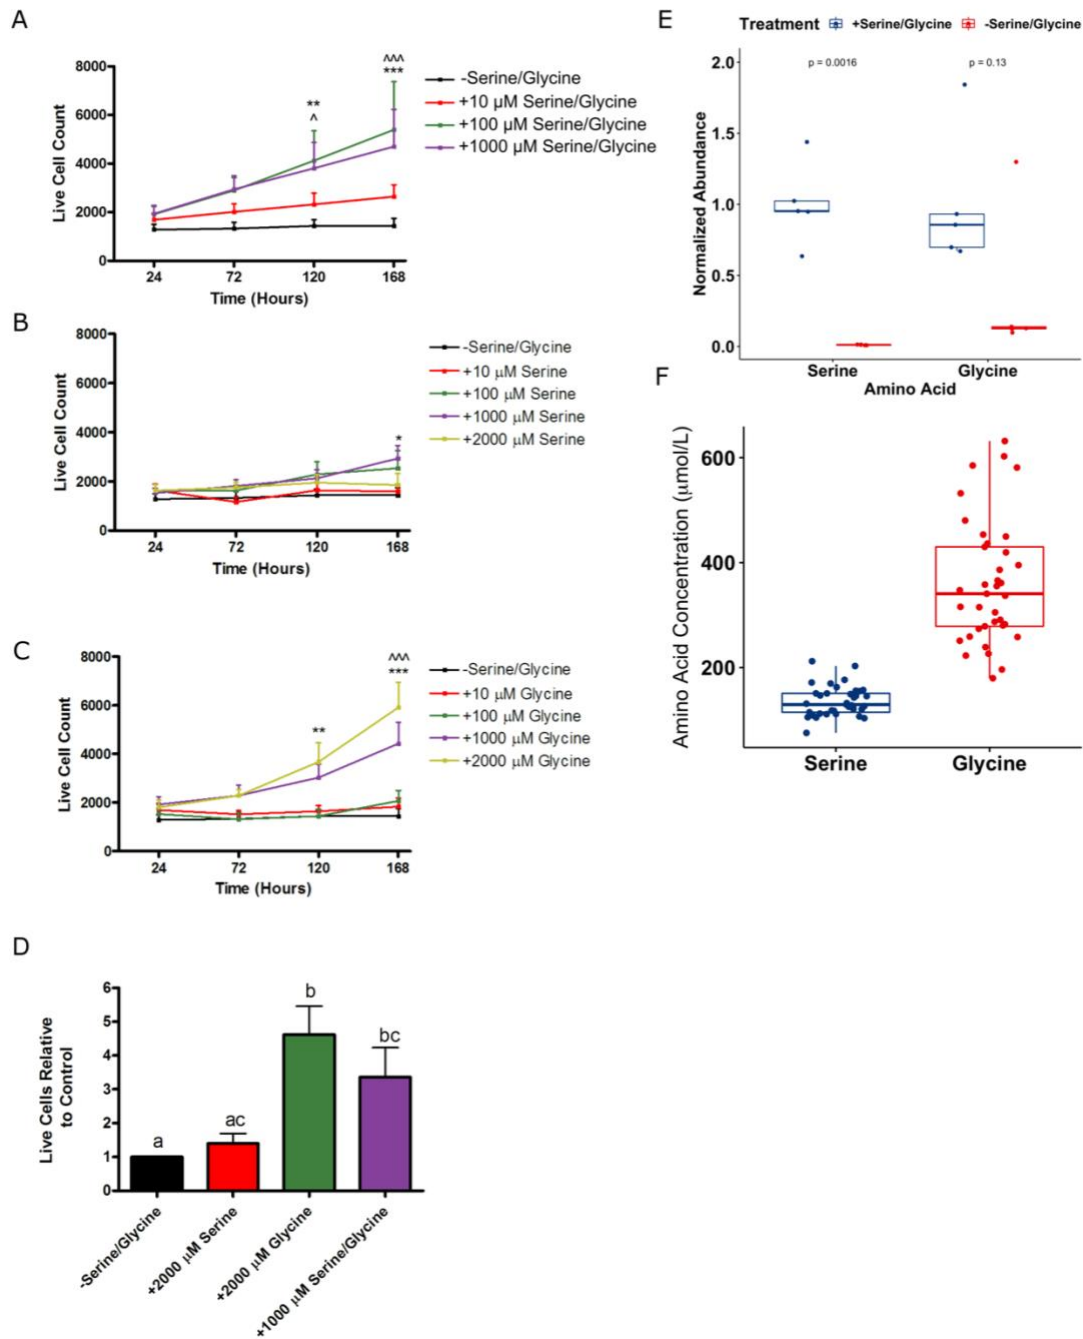

170

171 **Figure 2.** Serine and glycine are essential for *hMPC* population expansion.  
172 Live cell count was determined by co-staining cells with Hoecsht 33342 (to identify all cells)  
173 and propidium iodide (to identify dead cells) after *hMPCs* were cultured in media lacking  
174 serine/glycine or increasing concentrations of  
175 A) serine/glycine (\*\*indicates significant difference between 100  $\mu$ M vs. -serine/glycine,  
176  $P<0.01$ , \*\*\*indicates significant difference between 100  $\mu$ M vs. -serine/glycine,  $P<0.001$ ,  
177 ^indicates significant difference between 1000  $\mu$ M vs. -serine/glycine,  $P<0.05$ , ^^indicates  
178 significant difference between 1000  $\mu$ M vs. -serine/glycine,  $P<0.001$ ),  
179 B) serine alone (\*indicates significant difference between 1000 $\mu$ M vs. -serine/glycine,  $P<0.05$ ),  
180 or  
181 C) glycine alone (\*\*indicates significant difference between 2000  $\mu$ M vs. -serine/glycine,  
182  $P<0.01$ , \*\*\*indicates significant difference between 2000  $\mu$ M vs. -serine/glycine,  $P<0.001$ ,  
183 ^^indicates significant difference between 1000  $\mu$ M vs. -serine/glycine,  $P<0.001$ ) Data are  
184 expressed as mean  $\pm$  SD.  
185 D) The relative number of live cells after seven days of culture with the indicated concentrations  
186 of serine, glycine, or serine and glycine. Different letters are significantly different from each  
187 other.  
188 E) Levels of serine and glycine after 7 days of culture in serine/glycine restricted media as  
189 determined by GC-MS.  
190 F) Levels of serine and glycine in the plasma of fasted, young humans (n=37) based on GC-MS  
191 measurements.  
192  
193

194 *Serine/glycine restriction causes cell cycle arrest*

195         We next sought to understand what drives differences in *hMPC* population expansion  
196 when *hMPCs* are cultured with and without serine/glycine. We observed that differences in  
197 population expansion, during serine/glycine restriction, could not be explained by cell death  
198 (**Figure 3A**). Using DNA staining and analysis via flow cytometry, we observed a greater  
199 number of cells in the early phases of the cell cycle with serine/glycine restriction (**Figure 3B**).  
200 This finding was supported by reduced incorporation of BrdU into DNA after a 24-hour pulse  
201 (**Figure 3C**) and an accumulation of CYCLIN D1 protein in *hMPCs* cultured in serine/glycine  
202 restricted media (**Figure 3D**). Because *hMPC* differentiation is modeled *in vitro* by serum  
203 restriction (Pavlidou et al., 2017), we measured the *hMPC* specific, mid-to late-differentiation  
204 marker MYOGENIN, which was undetectable (**Figure 3E**). Additionally, levels of PAX7 and  
205 MYOD were significantly elevated in serine/glycine restricted *hMPCs* (**Figure 3E**). Elevated  
206 MYOD levels further supports cell cycle arrest in G1; MYOD protein levels are typically  
207 increased in *hMPCs* during G1 of the cell cycle (Kitzmann et al., 1998).

208         Previously, several proliferative cell types have demonstrated an exogenous requirement  
209 for serine/glycine (Labuschagne et al., 2014; Ma et al., 2017). The serine/glycine requirement in  
210 these cell types was attributed to DNA synthesis as the proliferative arrest can be rescued by  
211 glycine and formate, a one carbon unit integrated into the purine ring structure and necessary for  
212 the synthesis of thymidine, or by exogenous nucleotides. In contrast, in *hMPCs* the  
213 serine/glycine requirement appears to be derived from glycine (**Figure 2CD**) and is not DNA  
214 synthesis based as supplementation with nucleotide precursors did not rescue *hMPC* population  
215 expansion (**Figure 3F**).

216

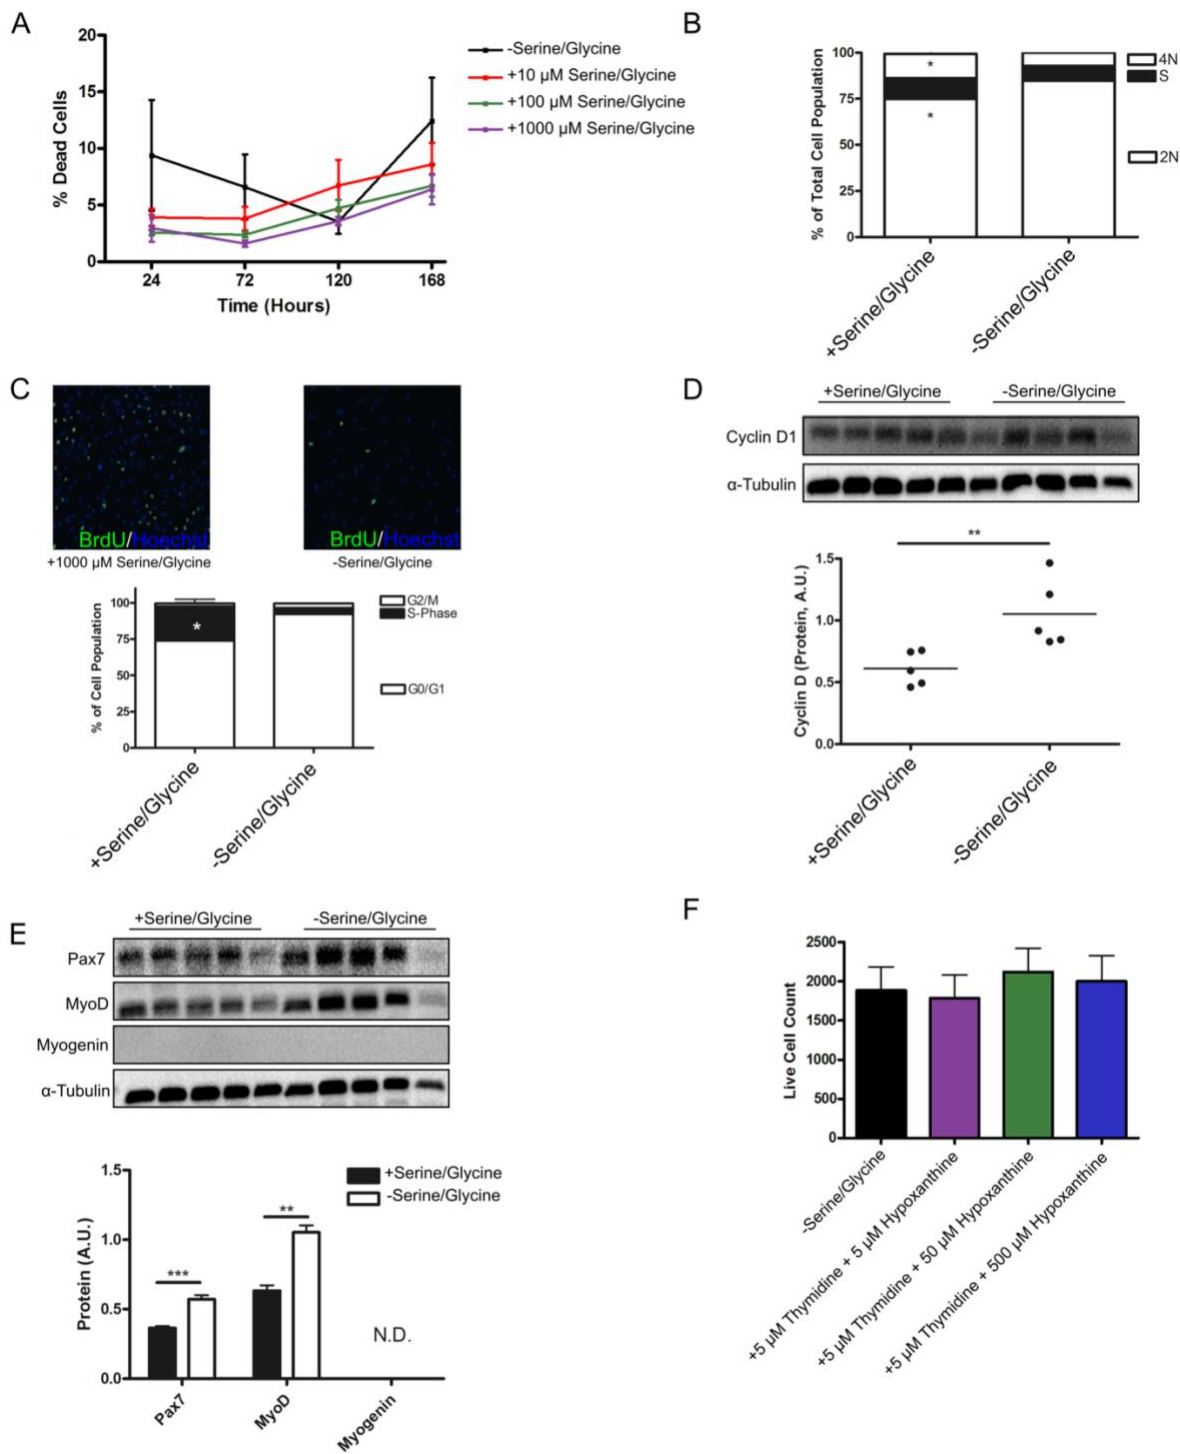

217

218

219

220 **Figure 3.** Serine/glycine restriction causes cell cycle arrest in G0/G1 in *hMPCs*.

221 A) Percentage of dead cells was quantified by dividing all *hMPCs* which stained positive for  
222 propidium iodide by all *hMPCs* which stained positive for Hoechst 33342 after 5 days of  
223 culture in media with varying concentrations of serine/glycine.

224 B) Propidium iodide staining and analysis via flow cytometry was used to determine DNA  
225 content of *hMPCs* after 5 days of serine/glycine restriction. \* $P < 0.05$ .

226 C) BrdU incorporation in after a 24-hour pulse in *hMPCs* undergoing serine/glycine  
227 restriction for 5 days. Data are expressed as mean  $\pm$  SD.

228 D) Immunoblot for CYCLIN D1 protein normalized to  $\alpha$ -TUBULIN for quantification in  
229 *hMPCs* that had been serine/glycine restricted for 5 days. \*\* $P < 0.01$ .

230 E) Immunoblot for PAX7, MYOD, and MYOGENIN protein normalized to  $\alpha$ -TUBULIN  
231 for quantification in *hMPCs* that had been serine/glycine restricted for 5 days. \*\* $P < 0.01$ ,  
232 \*\*\* $P < 0.001$ . N.D., not detectable. Data are expressed as mean  $\pm$  SD.

233 F) Live cell count for *hMPCs* treated with varying concentrations of thymidine and  
234 hypoxanthine. Data are expressed as mean  $\pm$  SD.

235 All experiments were repeated with *hMPCs* derived from the same 5 donors.

236

237

238

239

240

241

242

243 *hMPCs exhibit limited capacity for serine/glycine biosynthesis*

244 We hypothesized that *hMPCs* lack the ability for *de novo* serine/glycine biosynthesis, and  
245 that this underlies the exogenous requirements when *hMPCs* are cultured *in vitro*. In contrast to  
246 this hypothesis, RNA-seq analyses revealed that *hMPCs* drastically upregulate serine/glycine  
247 biosynthesis genes in response to serine/glycine restriction (**Figure 4A, Table S1**). We further  
248 verified that the enzymes directly implicated in serine/glycine biosynthesis (PHGDH, PSPH,  
249 PSAT1, SHMT1, SHMT2) are expressed at the protein level and the serine synthesis proteins,  
250 specifically, are upregulated in response to serine/glycine restriction (**Figure 4B**). The serine  
251 synthesis pathway branches from glycolysis at 3-phosphoglycerate, using glucose as the initial  
252 substrate (**Figure 1D**); however, glucose uptake did not increase after serine/glycine restriction  
253 (**Figure 4C**). Further, increasing glucose concentrations in the media did not affect *hMPC*  
254 proliferation in the absence of serine/glycine (**Figure 4D**), which suggests a limited capacity for  
255 serine/glycine biosynthesis by *hMPCs*. Using stable isotope tracing with  $^{13}\text{C}_6$  glucose, we  
256 determined that *de novo* biosynthesis accounts for no detectable intracellular serine and glycine  
257 when serine/glycine are available in the media (**Figure 4E**). During serine/glycine restriction, *de*  
258 *nov*o biosynthesis contributes ~25% of serine and ~5% of glycine to the intracellular pools  
259 (**Figure 4E**) demonstrating that *hMPCs* have the capacity for serine/glycine biosynthesis under  
260 restricted conditions. However, the increase in *de novo* biosynthesis is ineffective to maintain the  
261 requirements for population expansion as highlighted by the low levels of relative serine and  
262 glycine even when *de novo* biosynthesis is active (**Figure 2E**). Even if *hMPCs* were able to  
263 synthesize sufficient serine and glycine to support proliferation, we identified that primary  
264 *hMPCs* from older adults have reduced expression of the serine biosynthesis enzyme PHGDH,  
265 (**Figure 4F, n=10**) suggesting that *hMPC*-intrinsic *de novo* serine synthesis is likely impaired.





268 **Figure 4.** *hMPCs* exhibit limited capacity for serine/glycine biosynthesis.

269 A) Heatmap of genes involved in serine, glycine, and one-carbon metabolism based on  
270 RNA-sequencing data from *hMPCs* after 5 days of culture in serine/glycine replete (1000  
271  $\mu\text{M}$ ) or restricted conditions.

272 B) Immunoblots for PHGDH, PSAT1, PSPH, SHMT1, and SHMT2 protein normalized to  $\alpha$ -  
273 TUBULIN for quantification in *hMPCs* that had been serine/glycine restricted for 5 days.

274 C) Glucose uptake by *hMPCs* after 5 days of culture in serine/glycine replete or restricted  
275 conditions.

276 D) Live cell count of *hMPCs* cultured in serine/glycine replete media or serine/glycine  
277 restricted media and varying doses of glucose. \* $P < 0.05$ , \*\* $P < 0.01$  relative to  
278 serine/glycine containing control. Data are expressed as mean  $\pm$  SD.

279 E) Percent mass isotopomer distribution of [ $\text{U-}^{13}\text{C}$ ]-glucose-derived serine and glycine in  
280 *hMPCs* cultured in serine/glycine replete (1000  $\mu\text{M}$ ) or restricted media for 5 days  
281 followed by 48 hours in similar media but containing [ $\text{U-}^{13}\text{C}$ ]-glucose. Data are  
282 expressed as mean  $\pm$  SD.

283 F) Protein levels of the serine/glycine biosynthesis enzymes PHGDH, PSAT1, and PSPH in  
284 *hMPCs* obtained from younger ( $n=5$ ) and older ( $n=5$ ) individuals as determined by  
285 immunoblotting. \* $P < 0.05$ . Data expressed as mean  $\pm$  SD.

286 All experiments were repeated with *hMPCs* derived from the same 5 donors. P-values are  
287 indicated on the appropriate graphs.

288

289

290 *Serine/glycine restriction promotes oxidative stress in hMPCs and depletes intracellular*  
291 *glutathione*

292         Several genes related to glutathione biosynthesis were upregulated with serine/glycine  
293 depletion in the transcriptomic dataset (**Figures 4A, Figure 5A, Table S1**). Because glycine is  
294 one of the three amino acids that comprise the tripeptide glutathione, we hypothesized that  
295 serine/glycine restriction reduced glutathione levels in *hMPCs* and impaired population  
296 expansion. Serine/glycine restriction decreased total glutathione levels by approximately 9-fold  
297 in *hMPCs* (**Figure 5B**) and decreased the ratio of GSH:GSSG (**Figure 5C**). As would be  
298 expected with lower glutathione levels, the primary intracellular antioxidant, we observed an  
299 increase in the levels of reactive oxygen species (ROS, **Figures 5D**). Supplementation with a cell  
300 permeable version of glutathione, glutathione ethyl ester (GSHee), modestly increased  
301 intracellular glutathione levels (**Figure 5E**) and decreased ROS levels (**Figure 5F**). Despite only  
302 a modest effect on intracellular glutathione levels, GSHee did provide a minor rescue to *hMPC*  
303 population expansion (**Figure 5G**). Of note, high levels of cell permeable glutathione were toxic  
304 (**Figure S1**) and therefore, we were not able to investigate how increasing intracellular levels of  
305 glutathione to that observed in serine/glycine replete cells would impact *hMPC* population  
306 expansion. We propose that ROS, associated with *hMPC* proliferation, cannot be  
307 counterbalanced during serine/glycine restriction due to reduced glutathione synthesis caused by  
308 limited serine/glycine synthesis leading to cell cycle arrest.

309

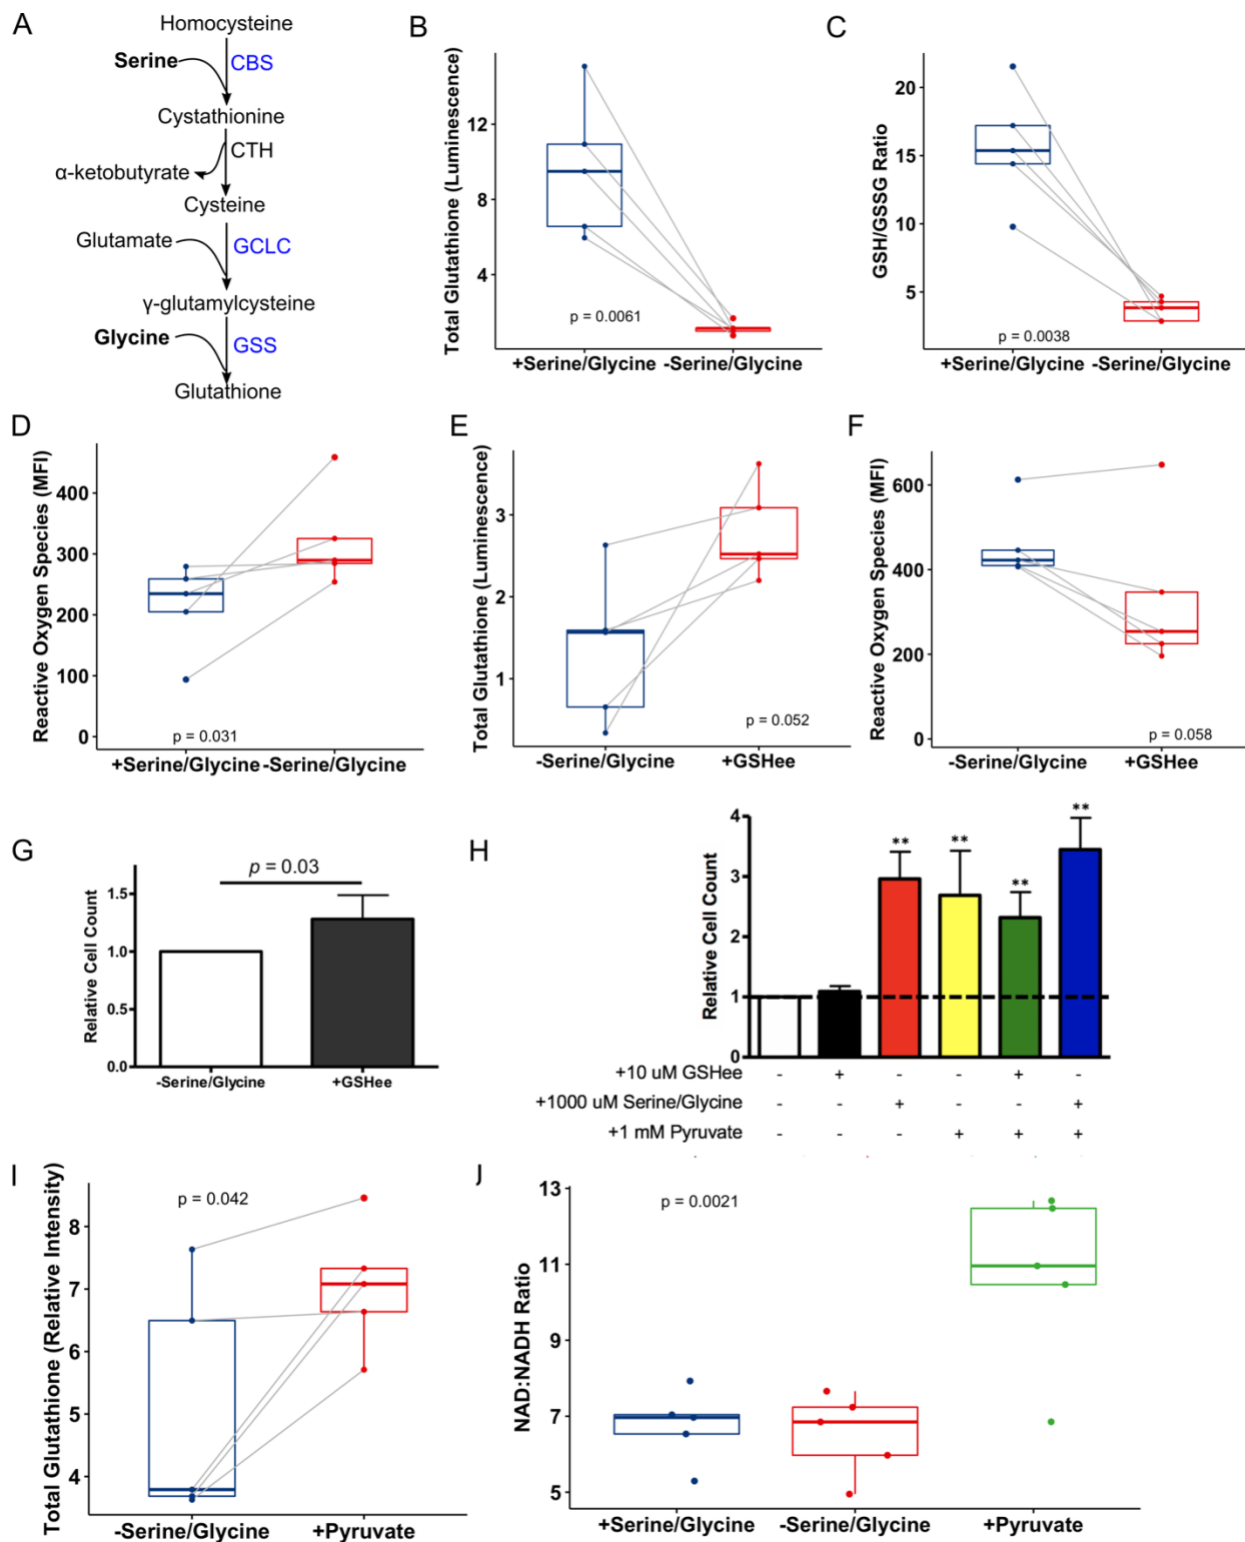

310

311

312 **Figure 5.** Serine/glycine restriction impairs glutathione synthesis but can be rescued by pyruvate  
313 supplementation.

314 A) The glutathione synthesis pathway with genes upregulated after serine/glycine restriction  
315 according to RNA-sequencing in blue. CBS, cystathionine  $\beta$ -synthase; CTH,  
316 cystathionine gamma-lyase; GCLC, glutamate-cysteine ligase catalytic subunit; GSS,  
317 glutathione synthetase.

318 B) Total intracellular glutathione levels in *hMPCs* after 5 days in serine/glycine restricted or  
319 replete media.

320 C) Ratio of reduced to oxidized intracellular glutathione levels in *hMPCs* after 5 days in  
321 serine/glycine restricted or replete media. GSH, reduced glutathione; GSSG, oxidized  
322 glutathione.

323 D) Reactive oxygen species in *hMPCs* after 5 days in serine/glycine restricted or replete  
324 media.

325 E) Total intracellular glutathione levels in *hMPCs* after 5 days of serine/glycine restriction  
326 with or without 10  $\mu$ M cell permeable glutathione ethyl ester (GSHee).

327 F) Reactive oxygen species in *hMPCs* after 5 days of serine/glycine restriction with or  
328 without 10  $\mu$ M GSHee.

329 G) Live cell count after 5 days of serine/glycine restriction with or without GSHee (10  $\mu$ M).

330 H) Live cell count after 5 days of the indicated combination and concentration of  
331 serine/glycine, GSHee, and pyruvate. \*\*P<0.01

332 I) Total glutathione levels in *hMPCs* cultured in a serine/glycine restricted media with or  
333 without 1 mM pyruvate for 5 days.

334 J) Ratio of oxidized NAD (NAD<sup>+</sup>):reduced NAD (NADH) in *hMPCs* cultured in restricted  
335 serine/glycine media or media containing 1000  $\mu$ M serine/glycine or 1 mM pyruvate.

336 All experiments were repeated with *hMPCs* derived from the same 5 donors. P-values are  
337 indicated on the appropriate graphs.

338

339

340

341

342

343

344

345

346

347

348

349

350

351

352

353

354

355

356

357 *Pyruvate rescues hMPC proliferation during serine/glycine restriction*

358 Under the assumption that inadequate glycine availability prevents adequate glutathione  
359 synthesis and ROS scavenging, we provided pyruvate in the absence of serine/glycine as an  
360 alternative antioxidant; we observed a complete rescue of the proliferative defect caused by  
361 serine/glycine restriction (**Figure 5H**). Pyruvate also increased total glutathione levels (**Figure**  
362 **5I**). An additional mechanism by which pyruvate supplementation may have rescued *hMPC*  
363 proliferation, during serine/glycine restriction, is by increasing the NAD<sup>+</sup>/NADH ratio through  
364 the reduction of pyruvate to lactate, which provides the necessary NAD<sup>+</sup> cofactor for serine  
365 biosynthesis (i.e., for the conversion of 3-phosphoglycerate to 3-phosphohydroxypyruvate,  
366 **Figure 1C**). Supporting this mechanism, pyruvate supplementation, in the absence of exogenous  
367 serine/glycine, increased the NAD<sup>+</sup>/NADH ratio which has recently been identified as the  
368 limiting cofactor for serine biosynthesis (Diehl et al., 2019) (**Figure 5J**).

369 *Serine/glycine restriction induces the integrated stress response in hMPCs*

370 We hypothesized that ATF4 may integrate the sensing of serine/glycine restriction and  
371 underlie the transcriptional upregulation of the serine/glycine biosynthetic genes (**Figure 4A**).  
372 We noted several ATF4 target genes that were affected by serine/glycine restriction in *hMPCs*  
373 (**Figure 6A**). We further verified that protein levels of ATF4 and its upstream regulator, p-eIF2 $\alpha$ ,  
374 are increased after serine/glycine restriction (**Figure 6B**). Phosphorylation of eIF2 $\alpha$  is known to  
375 coordinate a global decline in protein synthesis. In support of this, in the absence of  
376 serine/glycine, we observed an accumulation of most of the free, non-serine/glycine amino acids  
377 (**Figure 6C**) and a trend towards reduced protein synthesis (assessed by puromycin  
378 incorporation, **Figure 6D**).

379 To directly test whether the p-eIF2 $\alpha$  response was responsible for arrest of *hMPC*  
380 proliferation, *hMPCs* were cultured with the small molecule, p-eIF2 $\alpha$  inhibitor, ISRIB (Sidrauski  
381 et al., 2015) (**Figure 6E**). Treatment with ISRIB increased *hMPC* cell number in the absence of  
382 serine/glycine (**Figure 6F**). Interestingly, ISRIB treatment, in the presence of serine/glycine,  
383 negatively affected cell number (**Figure S2**) suggesting that the benefit of reducing p-eIF2 $\alpha$   
384 signaling on *hMPC* proliferation was only effective when aberrant signaling was induced by  
385 serine/glycine restriction. Therefore, we propose that serine/glycine restriction reduces the  
386 intracellular availability of serine, glycine, and glutathione, which activates the integrated stress  
387 response and leads to limited global translation and further to cell cycle arrest (**Figure 6G**).  
388 Overall, this process is likely exacerbated in older adults who lose serine availability in the  
389 microenvironment.

390

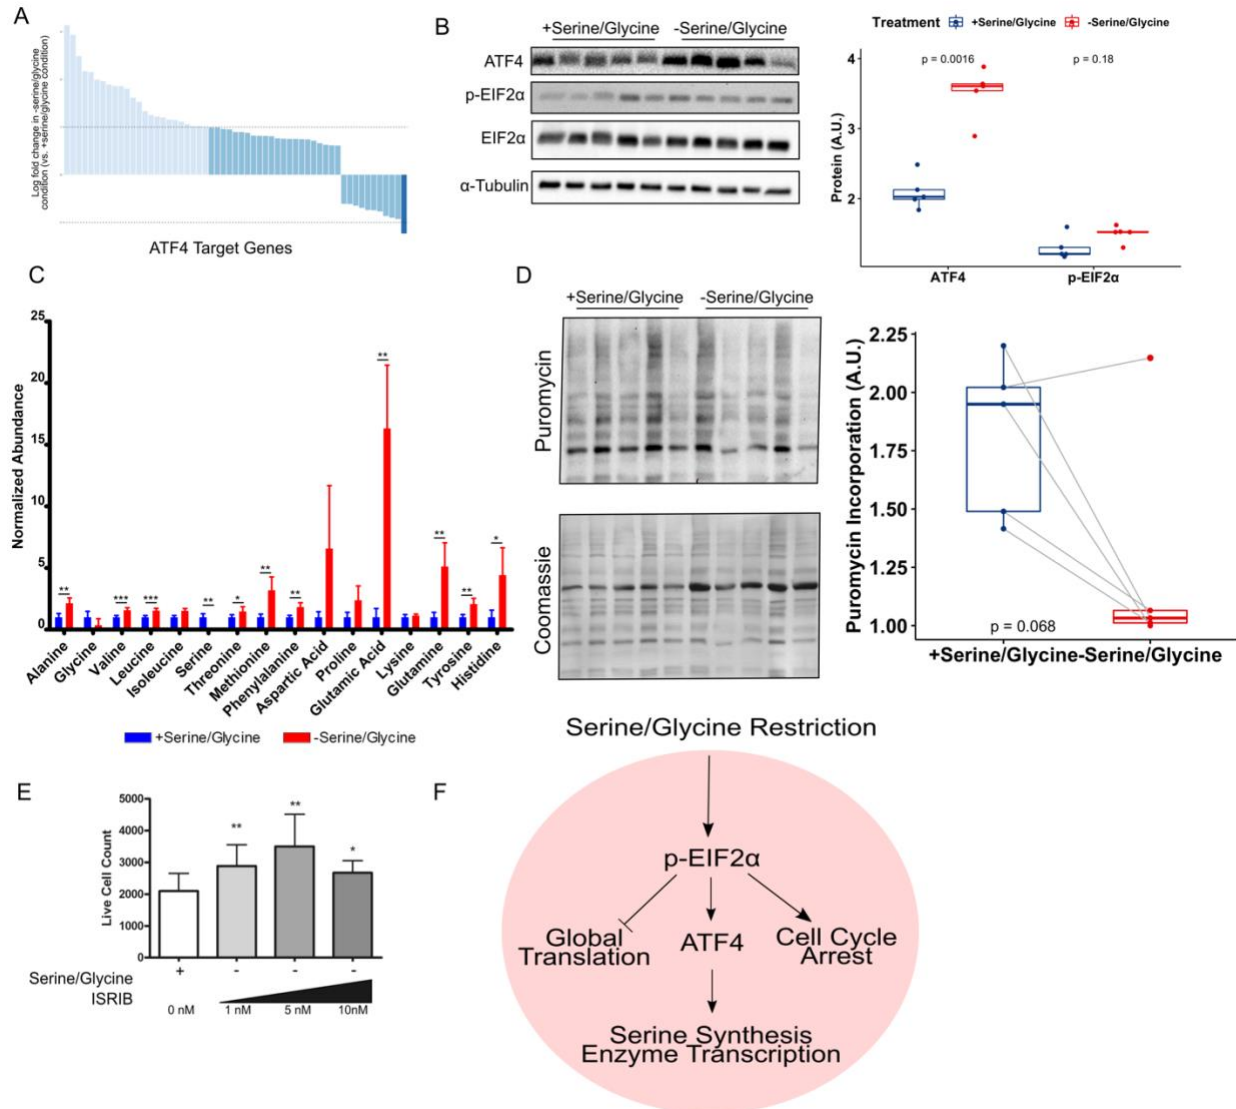

391

392

393 **Figure 6.** Serine/glycine restriction activates ATF4 in a p-EIF $\alpha$  dependent manner causing

394 *hMPC* proliferation arrest.

395 A) Expression of known ATF4 targets based on RNA-sequencing of *hMPCs* cultured in

396 serine/glycine restricted media or serine/glycine replete media for 5 days. Average log

397 fold change of transcripts in serine/glycine restricted samples vs. serine/glycine replete

398 samples. Dark blue indicates fold change < -1 and light blue indicates fold change > 1.



- 399 B) Left, protein levels of ATF4, p-eIF2 $\alpha$ , and total eIF2 $\alpha$  determined by immunoblotting  
400 *hMPCs* cultured in serine/glycine replete or restricted media. All proteins were  
401 normalized to  $\alpha$ -TUBULIN expression. Right, quantification of protein expression.
- 402 C) Intracellular amino acid abundance, normalized to total ion count, in *hMPCs* cultured in  
403 serine/glycine replete or restricted media for 5 days.
- 404 D) Left, immunoblot analysis for puromycin incorporation of *hMPCs* cultured in  
405 serine/glycine replete or restricted media for 5 days normalized to Coomassie staining.  
406 Right, quantification of puromycin incorporation.
- 407 E) Protein levels of p-eIF2 $\alpha$  and total eIF2 $\alpha$  determined by immunoblotting in *hMPCs*  
408 cultured in serine/glycine restricted media with and without 5 nM ISRIB. All proteins  
409 were normalized to  $\alpha$ -TUBULIN expression. Right, quantification of protein expression.
- 410 F) Live cell count after 5 days of serine/glycine restriction with or without varying doses of  
411 ISRIB.
- 412 G) Generalized model of how serine/glycine restriction affects EIF2 $\alpha$  and ATF4 to reduce  
413 global protein synthesis and cause cell cycle arrest.

414 All experiments were repeated with *hMPCs* derived from the same 5 donors. P-values are  
415 indicated on the appropriate graphs.

416

417

418

419

420

421

## 422 **Discussion**

423           Here, we report that aging reduces levels of serine in the *hMPC* microenvironment and  
424 that *hMPCs* are limited in their capacity for serine/glycine biosynthesis. The negative correlation  
425 between skeletal muscle levels of serine and age are in line with previous analyses comparing  
426 serum of younger and older individuals (Dunn et al., 2014; Menni et al., 2013). While glycine  
427 has not consistently been noted as reduced in the circulation of older adults, it has been shown to  
428 be reduced in the red blood cells of older adults and these reduced levels can be corrected by  
429 dietary supplementation (Sekhar et al., 2011). In support of a dysregulation of serine synthesis  
430 with age, we identified changes in expression of the serine synthesis enzymes with age in whole  
431 skeletal muscle tissue and in isolated *hMPCs*. Others have previously identified that the  
432 expression of metabolic enzymes and nutrient transporters can decline with age, however, the  
433 underlying reason for this remains elusive (Kawase et al., 2015). While our data are supportive  
434 of a decrease of serine levels in human skeletal muscle with age, potentially due to reduced  
435 biosynthesis, a direct measurement is necessary to definitively answer this question. Therefore, it  
436 is likely that reduced availability of serine/glycine to *hMPCs* is due to a combination of reduced  
437 *de novo* synthesis and dietary changes or metabolism with age.

438           The importance of decreased serine/glycine availability to *hMPCs* with age is highlighted  
439 by our identification of an absolute requirement for the non-essential amino acids, serine and  
440 glycine, for *hMPC* proliferation. A previous report, in rat MPCs, demonstrated that serine and  
441 glycine are required for proliferation likely due to a limited capacity for *de novo* serine synthesis  
442 (Dufresne et al., 1976). A more recent report found that C2C12 cells, an immortalized murine  
443 cell line mimicking MPCs, could proliferate in the presence of serine and absence of glycine but  
444 that proliferation was enhanced with the addition of glycine (Sun et al., 2016). It is possible that

445 glycine in the C2C12 cell model is synthesized from serine to maintain necessary glycine for  
446 cellular processes, however, isotope tracing was not conducted to test this theory. The work  
447 presented here builds upon these previous findings by extending them into a primary, human  
448 model and elucidating the mechanism for the *hMPC* serine/glycine requirement.

449         The skeletal muscle of older individuals has a diminished ability to regenerate after injury  
450 due to a decline in the function of MPCs. It has been demonstrated that repeated muscle injury in  
451 aged mice depletes the number of self-renewing MPCs and consequently skeletal muscle  
452 regeneration (Sousa-Victor et al., 2014). *hMPCs* isolated from older (vs. younger) donors exhibit  
453 diminished antioxidant capacity (Fulle et al., 2005) and *hMPCs* that are undergoing replicative  
454 senescence in culture, to model aging, exhibit increased ROS levels (Minet and Gaster, 2012).  
455 Together, this suggests that *hMPCs* from older individuals may have diminished skeletal muscle  
456 regeneration because of an inability to buffer the ROS produced as a natural consequence of  
457 proliferation (L'Honoré et al., 2018). Serine/glycine are required for glutathione synthesis to  
458 maintain physiological levels of ROS (L'Honoré et al., 2018) during proliferation as  
459 demonstrated by our experiments in which supplementation of cell-permeable glutathione,  
460 increased cell number in a modest but repeatable manner. Therefore, a decline in serine  
461 availability in the *hMPC* microenvironment, coupled with a decline in the *hMPC*-intrinsic  
462 capacity for *de novo* serine synthesis, may prevent adequate glutathione synthesis to buffer  
463 proliferation associated increases in intracellular ROS and lead to a reduction in the MPC pool in  
464 older individuals. Evidence exists that dietary intervention may be able to help maintain  
465 glutathione levels with advancing age. For example, a persistent metabolic phenotype associated  
466 with aging skeletal muscle is increased ROS due to impaired glutathione synthesis and this  
467 phenotype can be corrected with dietary supplementation of the glutathione precursors glycine

468 and cysteine (Sekhar et al., 2011). Future studies should examine the effect of dietary  
469 supplementation on glutathione production by aged MPCs.

470         There is a growing body of literature demonstrating that dietary glycine supplementation  
471 protects muscle mass and function during a number of disease states including cancer cachexia  
472 (Ham et al., 2014), muscle dystrophy (Ham et al., 2019), sepsis (Ham et al., 2016), and reduced  
473 calorie intake (Caldow et al., 2016). To date the beneficial effects of glycine supplementation on  
474 skeletal muscle in the disease state has been attributed to glycine's systemic anti-inflammatory  
475 effects, its contribution to balancing ROS signaling in whole skeletal muscle tissue, and its  
476 ability to restore skeletal muscle's anabolic response to leucine (Koopman et al., 2017).  
477 However, muscle dystrophy, specifically, is characterized by chronic MPC proliferation  
478 (Carnwath and Shotton, 1987) and genetic perturbations in MPCs have been shown to improve  
479 mouse models of muscle dystrophy by supporting maintenance of the MPC population (Gallot et  
480 al., 2018). Therefore, while much research has focused on understanding the role of dietary  
481 glycine supplementation on mature skeletal muscle as a mechanism for attenuating disease  
482 related skeletal muscle loss our data suggest that such dietary supplementation may also  
483 contribute to skeletal muscle maintenance by supporting MPC proliferation.

484         We demonstrate that inadequate intracellular serine/glycine and/or subsequent alterations  
485 in intracellular metabolism can be sensed in a p-eIF2 $\alpha$  dependent manner resulting in halted  
486 protein translation and cell cycle arrest. eIF2 $\alpha$  is a stress-sensing kinase that can integrate inputs  
487 from a number of signals to elicit the integrated stress response that directs ATF4 to upregulate  
488 genes associated with metabolism and nutrient uptake while limiting the expression of genes that  
489 are non-essential for immediate survival (Harding et al., 2003). The serine/glycine biosynthesis  
490 enzymes have been identified as ATF4 targets (DeNicola et al., 2015), highlighting the

491 importance of this pathway in mediating cell survival under stress conditions. It is unknown  
492 whether the stress signal, which elicited the ATF4 response in *hMPCs*, was the low levels of  
493 serine/glycine themselves, the buildup of ROS caused by reduced glutathione levels, or through  
494 another mechanism. eIF2 $\alpha$  is also a primary regulator of protein translation (Holcik and  
495 Sonenberg, 2005) and we demonstrated, in *hMPCs*, that serine/glycine restriction results in a  
496 reduction of protein translation and an accumulation of free amino acids. Inhibition of protein  
497 translation via a number of different approaches arrests cells in the G1 phase of the cell cycle  
498 (Polymenis and Aramayo, 2015). Similarly, phosphorylation of eIF2 $\alpha$  has been previously  
499 shown to be associated with fibroblast arrest in the G1 phase of the cell cycle; however, in  
500 opposition to our results, arrest in G1 by fibroblasts was associated with a decrease in cyclin D1  
501 translation (Hamanaka et al., 2005). In quiescent MPCs eIF2 $\alpha$  is maintained in a phosphorylated  
502 state and ATF4 levels are abundant (Zismanov et al., 2016). When MPCs transition from  
503 activation to proliferation p-eIF2 $\alpha$  as well as ATF4 levels decline (Zismanov et al., 2016).  
504 Furthermore, a point mutation in MPCs that prevents the phosphorylation of eIF2 $\alpha$  forces MPCs  
505 to break quiescence, a state of cell cycle arrest, and initiate proliferation (Zismanov et al., 2016).  
506 These results are similar to those found in this report when the cell cycle arrest initiated by  
507 serine/glycine restriction was overcome by treatment with ISRIB, an inhibitor of p-eIF2 $\alpha$ .

508         For the first time, we identified that *hMPCs* possess the capacity for *de novo*  
509 serine/glycine biosynthesis. Intriguingly, we note that serine/glycine biosynthesis only occurs  
510 when *hMPCs* are challenged with exogenous serine/glycine restriction. Furthermore, when  
511 serine/glycine synthesis does occur it is ineffective at restoring intracellular levels of  
512 serine/glycine to a degree necessary to support proliferation. The limited ability of *hMPCs* to  
513 produce adequate serine/glycine is at least partially attributable to a lack of NAD<sup>+</sup> to facilitate the

514 conversion of 3-phosphoglycerate to 3-phosphohydroxypyruvate and eventually serine rather  
515 than a lack of glucose to form 3-phosphoglycerate. This assertion is supported by the fact that  
516 addition of pyruvate which is converted to lactate via lactate dehydrogenase, a reaction which  
517 also oxidizes NADH to NAD<sup>+</sup>, increased the ratio of NAD<sup>+</sup>/NADH and rescued *hMPC*  
518 proliferation. Additionally, serine/glycine restriction did not increase glucose uptake nor did  
519 increasing levels of available glucose influence *hMPC* proliferation, suggesting that the  
520 limitation of serine synthesis was not driven by glycolytic substrate availability. We did note that  
521 serine/glycine restriction did not increase cell death and therefore it may be that serine/glycine  
522 biosynthesis is upregulated in serine/glycine deplete conditions to support cell survival.

523 In conclusion, we have outlined a novel requirement for exogenous serine/glycine to  
524 support *hMPC* proliferation. Furthermore, we have identified that the reduced availability of  
525 extracellular and intracellular serine/glycine in aging may contribute to the decline in *hMPC*-  
526 based skeletal muscle regeneration that occurs with aging.

527

528

529

530

531

532

533

534

535

536

537 **Methods**

538 *Participants*

539 Younger (21-40 years) and older adults (65-80 years) were recruited from the Tompkins  
540 County, New York area. Participants were excluded if they had a history of negative or allergic  
541 reactions to local anesthetic, used immunosuppressive medications, were prescribed to anti-  
542 coagulation therapy, were pregnant, had a musculoskeletal disorder, suffered from alcoholism  
543 (>11 drinks per week for women and >14 drinks per week for men) or other drug addictions, or  
544 were acutely ill at the time of participation (Gheller et al., 2019a; Riddle et al., 2018a). The  
545 Cornell University, Institutional Review Board approved the protocol and all subjects gave  
546 written informed consent in accordance with the Declaration of Helsinki.

547 *Human skeletal muscle biopsies*

548 Skeletal muscle tissue was obtained from the vastus lateralis muscle of humans using the  
549 percutaneous biopsy technique. Visible connective or adipose tissues were removed at the time  
550 of biopsy. For tissue homogenate experiments the biopsy sample was measured for wet weight  
551 and then snap-frozen in liquid nitrogen and stored at -80°C. For cell culture experiments a 60-  
552 100 mg portion of the tissue was stored in Hibernate®-A medium (Invitrogen) at 4°C until tissue  
553 disassociation was performed (within 48 hours).

554 *Amino acid analysis of human skeletal muscle tissue*

555 Frozen tissue samples (20-30 mg) were homogenized for 2 min using ceramic beads  
556 (Precellys 2 mL Hard Tissue Homogenizing Ceramic Beads Kit, Bertin Instruments, US) in 500  
557 µL -20°C methanol, 400 µL ice-cold saline, and 100 µL ice-cold H<sub>2</sub>O containing amino acid  
558 isotope labelled internal standards (Cambridge Isotope Laboratories, #MSK-A2-1.2). An aliquot  
559 of tissue homogenate (50 µL) was dried under air and resuspended in RIPA buffer for protein

560 quantification using bicinchoninic acid assay (BCA, BCA Protein Assay, Lambda, Biotech Inc.,  
561 US). 1 mL of chloroform was added to the remaining homogenate and the samples were  
562 vortexed for 5 min followed by centrifugation at 4°C for 5 min at 15 000 g. The organic phase  
563 was collected and the remaining polar phase was re-extracted with 1 mL of chloroform. An  
564 aliquot of the polar phase was collected, vacuum-dried at 4°C, and subsequently derivatized with  
565 2% (w/v) methoxyamine hydrochloride (Thermo Scientific) in pyridine for 60 min following by  
566 30 min sialylation N-tertbutyldimethylsilyl-N-methyltrifluoroacetamide (MTBSTFA) with 1%  
567 tert-butyldimethylchlorosilane (tBDMS) (Regis Technologies) at 37°C. Polar derivatives were  
568 analyzed by gas chromatography (GC)-mass spectrometry (MS) using a DB-35MS column (30m  
569 x 0.25 mm i.d. x 0.25 µm, Agilent J&W Scientific) installed in an Agilent 7890A GC interfaced  
570 with an Agilent 5975C MS as previously described (Wallace et al., 2018).

#### 571 *Amino acid analysis of human plasma*

572 3 µL of human plasma were spiked with 3 µL amino acid isotope labelled internal  
573 standards (Cambridge Isotope Laboratories, #MSK-A2-1.2) and extracted with 250 µL -20 °C  
574 methanol for 10 min and centrifuged at 4°C for 10 min at 15 000 g. 200 µL of supernatant was  
575 collected, vacuum-dried at 4°C, and derivatized with MTBSTFA and tBDMS as described for  
576 muscle polar analysis.

#### 577 *Primary hMPC culture*

578 Primary hMPC cultures were obtained as previously described (Riddle, Bender and A. E.  
579 Thalacker-Mercer, 2018; Riddle, Bender and A. Thalacker-Mercer, 2018; Gheller, J. Blum, *et*  
580 *al.*, 2019). Briefly, skeletal muscle tissue, stored in Hibernate®-A medium (Gibco), was minced  
581 and washed via gravity with Dulbecco's PBS (Gibco) and then digested using mechanical and  
582 enzymatic digestion in low glucose Dulbecco's Modified Eagle Medium (Gibco). This solution



583 was passed through a 70  $\mu$ m cell strainer into 5 mL of a growth media comprised of Ham's F12  
584 (Gibco), 20% FBS, 1% penicillin/streptomycin (Corning), and 5 ng/mL recombinant human  
585 basic fibroblast growth factor (bFGF, Promega) then centrifuged. The pelleted cells were  
586 resuspended in growth media containing 10% DMSO and cryopreserved at -80°C until isolation  
587 via flow cytometry. Primary *hMPCs* were sorted using fluorescence activated cell sorting with  
588 fluorescently-conjugated antibodies to cell surface antigens specific to *hMPCs* [CD56 (NCAM,  
589 BD Pharmingen) and CD29 ( $\beta$ 1-integrin, BioLegend)] and a viability stain (7-  
590 Aminoactinomycin D, eBioscience) (Xu et al., 2015). Passage six *hMPCs* were used for all  
591 experiments and were cultured in a 5% CO<sub>2</sub> atmosphere at 37°C on collagen coated plates (Type  
592 I, Rat Tail, Corning). For cell culture experiments, donor cells from females were used  
593 exclusively due to availability of adequate sample.

594 *hMPCs* were initially seeded in the growth medium described above before being  
595 switched to treatment medium 24 hours later. For all experiments a specially formulated DMEM  
596 devoid of serine, glycine, methionine, choline, pyridoxine, glucose, folate, nucleotides, and  
597 nucleosides that was supplemented with dialyzed and charcoal treated FBS (10%), 200  $\mu$ M  
598 methionine, 4 mg/L pyridoxine, 5 ng/mL bFGF, 25 nM (6S) 5-formylTHF, penicillin-  
599 streptomycin (1%), 10 mmol/L glucose, 4 mM Glutamax (Gibco), as well as L-serine and  
600 glycine in varying concentrations. Unless otherwise noted, all assays were performed after 5  
601 days in the treatment medium specified as this was the time point when differences in cell  
602 number between cells grown in serine/glycine restricted and replete media were initially  
603 identified. In all experiments cell culture media was replenished daily. All experiments contained  
604 appropriate vehicle controls (DMSO or sterile H<sub>2</sub>O).

605 *RNA isolation and quantification*

606 For quantitative RT-PCR analysis and RNA-sequencing (RNA-seq), RNA was isolated  
607 from *hMPCs* and using Omega E.Z.N.A.® Total RNA Kit I (Omega) according to the  
608 manufacturer's instructions. RNA was isolated from skeletal muscle biopsy tissue using Trizol  
609 Reagent (Ambion) as per manufacturer's instructions. RNA quantity was determined  
610 spectrophotometrically.

#### 611 *Quantitative RT-PCR*

612 Gene expression was measured using quantitative RT-PCR. cDNA was synthesized via  
613 reverse transcription of extracted RNA using the Applied Biosystems High-Capacity cDNA  
614 Reverse Transcription Kit. The Taqman Gene Expression System (Applied Biosystems) was  
615 used to measure mRNA expression levels of phosphoglycerate dehydrogenase (*PHGDH*,  
616 HS00358823), phosphoserine aminotransferase 1 (*PSATI*, Hs00268565), and phosphoserine  
617 phosphatase (*PSPH*, Hs01921296). All samples were normalized to *18S* (Hs99999901)  
618 expression.

#### 619 *RNA library preparation and sequencing*

620 Prior to RNA-seq, RNA quality was determined using an AATI Fragment Analyzer; all  
621 samples had an RNA quality number >8.5. The NEBNext Ultra II RNA Library Prep Kit (New  
622 England Biolabs) was used to generate TruSeq-barcoded RNA-Seq libraries. Libraries were  
623 quantified with the Qubit 2.0 (dsDNA HS kit; Thermo Fisher) and size distribution was  
624 measured with a Fragment Analyzer (Advanced Analytical) before pooling. A NextSeq500  
625 (Illumina) was used for sequencing, and a minimum of 20 M single-end 75 bp reads per library  
626 were obtained. Cutadapt v1.8 was used to trim low quality reads and adaptor sequences  
627 (parameters: -m 50 -q 20 -a AGATCGGAAGAGCACACGTCTGAACTCCAG-match-read-  
628 wild cards) (Martin, 2011). Tophat v2.1 was used to map reads to the reference genome

629 (parameters:-library-type=fr-firststrandon-no-novel-juncs-G<ref\_genes.gtf>) (Kim et al., 2013).  
630 Differential gene expression analysis was performed using *edgeR* (McCarthy et al., 2012). Only  
631 genes with at least 2 counts per million in at least three of the samples were retained for analysis.

### 632 *Immunoblot analysis*

633 For immunoblot analysis, protein was isolated from *hMPCs* with RIPA buffer containing  
634 phosphatase (PhosSTOP, Roche) and protease (cOmplete, Roche) inhibitors. The protein  
635 concentration was quantified by BCA. 8-15  $\mu\text{g}$  of protein was loaded on 10% SDS gels and  
636 transferred to PVDF membranes. Membranes were incubated in primary antibodies PHGDH  
637 (Proteintech), PSAT1 (Proteintech), PSPH (Proteintech), SHMT1 (Stover laboratory) (Woeller et  
638 al., 2007), SHMT2 (Stover laboratory) (Anderson and Stover, 2009), Cyclin D1 (Cell Signaling),  
639 ATF4 (Cell Signaling), phosphorylated (Ser51) p-EIF2 $\alpha$  (Cell Signaling), and total EIF2 $\alpha$  (Cell  
640 Signaling) diluted (1:1000) in a chemiluminescent blocking buffer (bl $\emptyset$ <sub>KTM</sub> – CH, Millipore)  
641 overnight at 4°C. After the overnight incubation, membranes were washed with 0.1% Tween in  
642 tris-buffered saline before incubation with appropriate secondary antibody (rabbit, Proteintech;  
643 goat, Thermo Scientific; mouse, Proteintech; goat, Pierce) at a 1:100000 dilution in a  
644 chemiluminescent blocking buffer, at room temperature, for 60 min. Membranes were visualized  
645 after a brief incubation in SuperSignal™ West Femto (Thermo Scientific) on the Bio-Rad  
646 ChemiDoc MP. Protein expression was normalized to  $\alpha$ -TUBULIN expression (Cell Signaling)  
647 using the ImageLab 4.1 software (Bio-Rad).

### 648 *Live and dead cell counting*

649 Live cell number was determined by co-staining cells with Hoechst 33342 (to identify  
650 number of nuclei, Life Technologies) and propidium iodide (to identify dead cells, ThermoFisher  
651 Scientific). The number of live cells was determined by subtracting the number of propidium

652 iodide positive cells from the Hoechst 33342 positive cells as identified using the Celigo imaging  
653 cytometer (Nexcelcom).

#### 654 *Cell cycle analysis*

655 For cell cycle analysis, *hMPCs* were pelleted, washed with ice-cold PBS, re-pelleted and  
656 resuspended in PBS then fixed in 3:1 volume:volume 100% ice-cold ethanol before being stored  
657 at 4 °C overnight. The following day, cells were pelleted, washed with ice-cold PBS, and  
658 resuspended in 400  $\mu$ L PBS containing 2 mM EDTA. Cell suspensions were incubated with 100  
659  $\mu$ L 10 mg/mL RNase A (VWR) for 30 min at 37 °C, to degrade RNA, followed by DNA staining  
660 with 50  $\mu$ L of 1 mg/mL propidium iodide for 30 min, in the dark, at room temperature.  
661 Propidium iodide intensity was measured using a flow cytometer (BD Aria Fusion). The  
662 percentage of the total population of cells in G1, S-phase, G2 cells were determined using  
663 FlowJo's (Becton, Dickinson, and Company) univariate platform.

#### 664 *5-bromo-2'-deoxyuridine (BrdU) incorporation*

665 To determine the proportion of cells actively synthesizing DNA, *hMPCs* were pulsed  
666 with BrdU for 24 hours. *hMPCs* were washed with prewarmed PBS before being fixed in ice-  
667 cold methanol for 5 min. Cells were washed with PBS before 30 min of acid hydrolysis and cell-  
668 permeabilization in 2 N HCl prepared in 0.1% PBS-Tween20. Cells were washed with PBS  
669 before being blocked in 1% BSA/10% normal goat serum/0.3 M glycine/0.1% PBS-Tween20  
670 followed by washing in PBS. Fixed and blocked *hMPCs* were incubated overnight at 4 °C with an  
671 anti-BrdU antibody (1:400 dilution, Biolegend) followed by PBS washes and a 60 min  
672 incubation with an Alexa-Fluor 488 conjugated anti-mouse secondary antibody (Invitrogen).  
673 Finally, *hMPCs* were washed with PBS and incubated with Hoechst 33342 before visualization  
674 and analysis using the Celigo imaging cytometer (Nexcelcom).

675 *Glucose uptake*

676           Glucose uptake was measured based on the detection of 2-deoxyglucose-6-phosphate  
677 uptake by a commercially available luminescence-based kit (Glucose Uptake-Glo™ Assay,  
678 Promega) on a SpectraMax M3 (Molecular Devices). Values were normalized to total cell count  
679 obtained from a parallel plate.

680 *Stable-Isotope Labeling, Metabolite Extraction, and GC-MS Analysis*

681           For isotopic labeling experiments, cells were cultured in 10 mM [U-<sup>13</sup>C<sub>6</sub>]glucose  
682 (Cambridge Isotope Laboratories, Inc.) containing either 1000 μM serine/glycine or no  
683 serine/glycine for 48 h prior to extraction. A medium exchange was performed after 24 hours.  
684 On the day of extraction, polar metabolites were extracted as previously described (Cordes and  
685 Metallo, 2019).

686           The upper aqueous phase was derivatized using a Gerstel MPS with 15 μL of 2% (w/v)  
687 methoxyamine hydrochloride (Thermo Scientific) in pyridine (incubated for 60 min at 45°C) and  
688 followed by 15 μL MTBSTFA with 1% tert-butyldimethylchlorosilane (Regis Technologies)  
689 (incubated for 30 min at 45°C). Polar derivatives were analyzed by GC-MS using a DB-35MS  
690 column (30 m x 0.25 mm i.d. x 0.25 μm) installed in an Agilent 7890B GC interfaced with an  
691 Agilent 5977B MS with an XTR EI source using the following temperature program: 100°C  
692 initial, increase by 3.5°C/min to 255°C, increase by 15°C/min to 320°C and hold for 3 min.

693 *Glutathione measurements*

694           Total and oxidized (GSSG) glutathione were measured using a commercially available  
695 luminescence-based kit (GSH-GSSG Glo™ Assay, Promega) on a SpectraMax M3 (Molecular  
696 Devices). The reduced (GSH) to oxidized GSSG ratio was determined by multiplying the GSSG  
697 reading by 2, to account for each mole of oxidized GSSG producing two moles of total

698 glutathione, subtracting that number from the total glutathione levels and finally, dividing this  
699 value by the total GSSG reading. Values were normalized to total cell count obtained from a  
700 parallel plate.

#### 701 *Reactive oxygen species detection*

702 To determine the intracellular level of ROS, *hMPCs* were pelleted and resuspended in 1  
703 mL pre-warmed PBS with CellROX Green Reagent (Invitrogen), a cell-permeable dye which  
704 fluoresces green and binds to DNA upon oxidation, at a final concentration of 5  $\mu$ M. After a 30  
705 min incubation at 37°C, *hMPCs* were washed with PBS before being fixed in 2%  
706 paraformaldehyde for 10 min at room temperature. *hMPCs* were again washed with PBS before  
707 finally being resuspended in 300  $\mu$ L 0.5 mM EDTA in PBS and analyzed via flow cytometry  
708 (BD Aria Fusion).

#### 709 *NAD/NADH measurements*

710 The reduced NAD (NADH) to oxidized NAD (NAD<sup>+</sup>) ratio was determined in *hMPCs*  
711 via a commercially available luminescence-based kit (NAD/NADH Glo™ Assay, Promega)  
712 following the manufacturer's instructions. Luminescence values were obtained with a  
713 SpectraMax M3 (Molecular Devices) and normalized to total cell count obtained from a parallel  
714 plate.

#### 715 *Protein synthesis*

716 The SUnSET Method (Schmidt et al., 2009) was used to quantify the rate of puromycin  
717 incorporation to approximate protein synthesis (Henrich, 2016). *hMPCs* were treated with 0.5  
718  $\mu$ g/mL puromycin (Thermo Fisher) for 30 min and then immediately harvested in RIPA buffer  
719 and protein was isolated as described above. Immunoblotting was performed, as described, using  
720 a primary antibody specific for puromycin (Millipore) diluted 1:1000 in a chemiluminescent

721 blocking buffer overnight, prior to incubation in secondary antibody (mouse, Proteintech) diluted  
722 1:100000. *hMPCs* were incubated in SuperSignal™ West Femto (Thermo Scientific) and imaged  
723 on the Bio-Rad ChemiDoc MP. Puromycin expression was normalized to the total protein level  
724 in each respective lane as determined by Coomassie staining and imaging on the Bio-Rad  
725 ChemiDoc MP using the ImageLab 4.1 software (Bio-Rad).

## 726 *Statistics*

727 Statistical analyses were performed in R Studio (Version 1.0.136). For metabolite  
728 analysis of whole skeletal muscle tissue, the normalcy of the distribution of each amino acid was  
729 assessed by the Shapiro-Wilk test. If data were determined to be normally distributed, they were  
730 compared via an unpaired t-test otherwise they were compared by a Mann-Whitney U-test. The  
731 correlation between skeletal muscle serine levels and age were determine using a Pearson  
732 correlation coefficient. When comparing gene and protein expression between age groups, an  
733 unpaired t-test was performed. For cell counting experiments, two-way analysis of variance  
734 (ANOVA) was performed with time and treatment being the main factors. A Tukey *post hoc* test  
735 was performed if the interaction term was significant ( $P < 0.05$ ). For all *hMPC* assays, either a  
736 paired t-test or a repeated measures ANOVA was employed.

737

738

739

740

741

742

743

744 **Acknowledgments**

745 This work was financially supported by a President's Council of Cornell Women Award (to  
746 A.T.M), Cornell University Division of Nutritional Sciences funds (to A.T.M), and a Canadian  
747 Institutes for Health Research Doctoral Foreign Study Award (to B.J.G), and NIH grant  
748 R01CA234245 (to C.M.M.).

749

750 **Author Contributions**

751 Conceptualization, B.J.G, P.J.S, and A.E.T.; Methodology, B.J.G, M.S.F., P.J.S., and A.E.T.;  
752 Investigation, B.J.G, J.E.B, M.E.G., E.W.L., and M.K.H.; Resources, E.B., P.J.S, M.S.F.,  
753 B.D.C., C.M., and A.E.T.; Writing – Original Draft, B.J.G. and A.E.T.; Writing – Review and  
754 Editing, B.J.G., J.E.B, M.E.G., E.W.L., M.K.H., P.J.S., M.S.F., B.D.C., C.M.M., and A.E.T.;  
755 Supervision, A.E.T.

756

757 **Declaration of Interests**

758 The authors declare no conflicts of interest.

759

760

761

762

763

764

765

766



767

## References

- 768 Anderson, D.D., and Stover, P.J. (2009). SHMT1 and SHMT2 are functionally redundant in  
769 nuclear de novo thymidylate biosynthesis. *PLoS One* 4.
- 770 Bergström, J., Fürst, P., Norée, L.O., and Vinnars, E. (2017). Intracellular free amino acid  
771 concentration in human muscle tissue. *J. Appl. Physiol.* 36, 693–697.
- 772 Blau, H.M., Cosgrove, B.D., and Ho, A.T.V. (2015). The central role of muscle stem cells in  
773 regenerative failure with aging. *Nat. Med.* 21, 854–862.
- 774 Brack, A.S., Conboy, M.J., Roy, S., Lee, M., Kuo, C.J., Keller, C., and Rando, T.A. (2007).  
775 Increased Wnt signaling during aging alters muscle stem cell fate and increases fibrosis. *Science*  
776 (80-. ). 317, 807–810.
- 777 Caldow, M.K., Ham, D.J., Godeassi, D.P., Chee, A., Lynch, G.S., and Koopman, R. (2016).  
778 Glycine supplementation during calorie restriction accelerates fat loss and protects against  
779 further muscle loss in obese mice. *Clin. Nutr.* 35, 1118–1126.
- 780 Carnwath, J.W., and Shotton, D.M. (1987). Muscular dystrophy in the mdx mouse:  
781 Histopathology of the soleus and extensor digitorum longus muscles. *J. Neurol. Sci.* 80, 39–54.
- 782 Conboy, I.H., Conboy, M.J., Smythe, G.M., and Rando, T.A. (2003). Notch-Mediated  
783 Restoration of Regenerative Potential to Aged Muscle. *Science* (80-. ). 302, 1575–1577.
- 784 Conboy, I.M., Conboy, M.J., Wagers, A.J., Girma, E.R., Weissman, I.L., and Rando, T.A.  
785 (2005). Rejuvenation of aged progenitor cells by exposure to a young systemic environment.  
786 *Nature* 433, 760–764.
- 787 Cordes, T., and Metallo, C.M. (2019). Quantifying intermediary metabolism and lipogenesis in  
788 cultured mammalian cells using stable isotope tracing and mass spectrometry. In *Methods in*  
789 *Molecular Biology*, pp. 219–241.

790 DeNicola, G.M., Chen, P.H., Mullarky, E., Sudderth, J.A., Hu, Z., Wu, D., Tang, H., Xie, Y.,  
791 Asara, J.M., Huffman, K.E., et al. (2015). NRF2 regulates serine biosynthesis in non-small cell  
792 lung cancer. *Nat. Genet.* *47*, 1475–1481.

793 Diehl, F.F., Lewis, C.A., Fiske, B.P., and Vander Heiden, M.G. (2019). Cellular redox state  
794 constrains serine synthesis and nucleotide production to impact cell proliferation. *Nat. Metab.*

795 Dufresne, M.J.P., MacLeod, J., Rogers, J., and Sanwal, B.D. (1976). Serine auxotrophy of  
796 myoblasts in primary and secondary culture. *Biochem. Biophys. Res. Commun.* *70*, 1085–1090.

797 Dunn, W.B., Lin, W., Broadhurst, D., Begley, P., Brown, M., Zelena, E., Vaughan, A.A.,  
798 Halsall, A., Harding, N., Knowles, J.D., et al. (2014). Molecular phenotyping of a UK  
799 population: defining the human serum metabolome. *Metabolomics* *11*, 9–26.

800 Egerman, M.A., Cadena, S.M., Gilbert, J.A., Meyer, A., Nelson, H.N., Swalley, S.E., Mallozzi,  
801 C., Jacobi, C., Jennings, L.L., Clay, I., et al. (2015). GDF11 Increases with Age and Inhibits  
802 Skeletal Muscle Regeneration. *Cell Metab.* *22*, 164–174.

803 Fazelzadeh, P., Hangelbroek, R.W.J., Tieland, M., De Groot, L.C.P.G.M., Verdijk, L.B., Van  
804 Loon, L.J.C., Smilde, A.K., Alves, R.D.A.M., Vervoort, J., Müller, M., et al. (2016). The Muscle  
805 Metabolome Differs between Healthy and Frail Older Adults. *J. Proteome Res.* *15*, 499–509.

806 Fulle, S., Di Donna, S., Puglielli, C., Pietrangelo, T., Beccafico, S., Bellomo, R., Protasi, F., and  
807 Fanò, G. (2005). Age-dependent imbalance of the antioxidative system in human satellite cells.  
808 *Exp. Gerontol.* *40*, 189–197.

809 Gallot, Y.S., Straughn, A.R., Bohnert, K.R., Xiong, G., Hindi, S.M., and Kumar, A. (2018).  
810 MyD88 is required for satellite cell-mediated myofiber regeneration in dystrophin-deficient mdx  
811 mice. *Hum. Mol. Genet.* *27*, 3449–3463.

812 Gannon, M.C., Nuttall, J.A., and Nuttall, F.Q. (2002). The metabolic response to ingested

813 glycine. *Am. J. Clin. Nutr.* *76*, 1302–1307.

814 Garofalo, K., Penno, A., Schmidt, B.P., Lee, H.J., Frosch, M.P., Von Eckardstein, A., Brown,  
815 R.H., Hornemann, T., and Eichler, F.S. (2011). Oral L-serine supplementation reduces  
816 production of neurotoxic deoxysphingolipids in mice and humans with hereditary sensory  
817 autonomic neuropathy type 1. *J. Clin. Invest.* *121*, 4735–4745.

818 Gheller, B.J., Blum, J.E., Merritt, E.K., Cummings, B.P., and Thalacker-Mercer, A.E. (2019a).  
819 Peptide YY (PYY) is expressed in human skeletal muscle tissue and expanding human muscle  
820 progenitor cells. *Front. Physiol.* *10*.

821 Gheller, B.J., Blum, J., Soueid-Baumgarten, S., Bender, E., Cosgrove, B.D., and Thalacker-  
822 Mercer, A. (2019b). Isolation, Culture, Characterization, and Differentiation of Human Muscle  
823 Progenitor Cells from the Skeletal Muscle Biopsy Procedure. *J. Vis. Exp.*

824 Ham, D.J., Murphy, K.T., Chee, A., Lynch, G.S., and Koopman, R. (2014). Glycine  
825 administration attenuates skeletal muscle wasting in a mouse model of cancer cachexia. *Clin.*  
826 *Nutr.* *33*, 448–458.

827 Ham, D.J., Caldow, M.K., Chhen, V., Chee, A., Wang, X., Proud, C.G., Lynch, G.S., and  
828 Koopman, R. (2016). Glycine restores the anabolic response to leucine in a mouse model of  
829 acute inflammation. *Am. J. Physiol. - Endocrinol. Metab.* *310*, E970–E981.

830 Ham, D.J., Gardner, A., Kennedy, T.L., Trieu, J., Naim, T., Chee, A., Alves, F.M., Caldow,  
831 M.K., Lynch, G.S., and Koopman, R. (2019). Glycine administration attenuates progression of  
832 dystrophic pathology in prednisolone-treated dystrophin/utrophin null mice. *Sci. Rep.* *9*, 12982.

833 Hamanaka, R.B., Bennett, B.S., Cullinan, S.B., and Diehl, J.A. (2005). PERK and GCN2  
834 contribute to eIF2 $\alpha$  phosphorylation and cell cycle arrest after activation of the unfolded protein  
835 response pathway. *Mol. Biol. Cell* *16*, 5493–5501.

836 Harding, H.P., Zhang, Y., Zeng, H., Novoa, I., Lu, P.D., Calfon, M., Sadri, N., Yun, C., Popko,  
837 B., Paules, R., et al. (2003). An integrated stress response regulates amino acid metabolism and  
838 resistance to oxidative stress. *Mol. Cell* *11*, 619–633.

839 Henrich, C.J. (2016). A microplate-based nonradioactive protein synthesis assay: Application to  
840 TRAIL sensitization by protein synthesis inhibitors. *PLoS One*.

841 Holcik, M., and Sonenberg, N. (2005). Translational control in stress and apoptosis. *Nat. Rev.*  
842 *Mol. Cell Biol.* *6*, 318–327.

843 Hosios, A.M., Hecht, V.C., Danai, L. V., Johnson, M.O., Rathmell, J.C., Steinhauser, M.L.,  
844 Manalis, S.R., and Vander Heiden, M.G. (2016). Amino Acids Rather than Glucose Account for  
845 the Majority of Cell Mass in Proliferating Mammalian Cells. *Dev. Cell*.

846 Houtkooper, R.H., Argmann, C., Houten, S.M., Cantó, C., Jeninga, E.H., Andreux, Pénelope A.,  
847 Thomas, C., Doenlen, R., Schoonjans, K., and Auwerx, J. (2011). The metabolic footprint of  
848 aging in mice. *Sci. Rep.* *1*.

849 Katsanos, C.S., Kobayashi, H., Sheffield-Moore, M., Aarsland, A., and Wolfe, R.R. (2006). A  
850 high proportion of leucine is required for optimal stimulation of the rate of muscle protein  
851 synthesis by essential amino acids in the elderly. *Am. J. Physiol. - Endocrinol. Metab.* *291*.

852 Kawase, A., Ito, A., Yamada, A., and Iwaki, M. (2015). Age-related changes in mRNA levels of  
853 hepatic transporters, cytochrome P450 and UDP-glucuronosyltransferase in female rats. *Eur. J.*  
854 *Drug Metab. Pharmacokinet.* *40*, 239–244.

855 Kim, D., Perte, G., Trapnell, C., Pimentel, H., Kelley, R., and Salzberg, S.L. (2013). TopHat2:  
856 Accurate alignment of transcriptomes in the presence of insertions, deletions and gene fusions.  
857 *Genome Biol.* *14*.

858 Kitzmann, M., Carnac, G., Vandromme, M., Primig, M., Lamb, N.J.C., and Fernandez, A.

859 (1998). The muscle regulatory factors MyoD and Myf-5 undergo distinct cell cycle-specific  
860 expression in muscle cells. *J. Cell Biol.*

861 Koopman, R., Caldow, M.K., Ham, D.J., and Lynch, G.S. (2017). Glycine metabolism in skeletal  
862 muscle: Implications for metabolic homeostasis. *Curr. Opin. Clin. Nutr. Metab. Care* 20, 237–  
863 242.

864 Kouchiwa, T., Wada, K., Uchiyama, M., Kasezawa, N., Niisato, M., Murakami, H., Fukuyama,  
865 K., and Yokogoshi, H. (2012). Age-related changes in serum amino acids concentrations in  
866 healthy individuals. *Clin. Chem. Lab. Med.* 50, 861–870.

867 L'Honoré, A., Commère, P.H., Negroni, E., Pallafacchina, G., Friguet, B., Drouin, J.,  
868 Buckingham, M., and Montarras, D. (2018). The role of Pitx2 and Pitx3 in muscle 1 stem cells  
869 gives new insights into P38 $\alpha$  MAP kinase and redox regulation of muscle regeneration. *Elife* 7.

870 Labuschagne, C.F., van den Broek, N.J.F., Mackay, G.M., Vousden, K.H., and Maddocks,  
871 O.D.K. (2014). Serine, but not glycine, supports one-carbon metabolism and proliferation of  
872 cancer cells. *Cell Rep.* 7, 1248–1258.

873 Ma, E.H., Bantug, G., Griss, T., Condotta, S., Johnson, R.M., Samborska, B., Mainolfi, N., Suri,  
874 V., Guak, H., Balmer, M.L., et al. (2017). Serine Is an Essential Metabolite for Effector T Cell  
875 Expansion. *Cell Metab.* 25, 345–357.

876 Martin, M. (2011). Cutadapt removes adapter sequences from high-throughput sequencing reads.  
877 *EMBnet.Journal* 17, 10.

878 McCarthy, D.J., Chen, Y., and Smyth, G.K. (2012). Differential expression analysis of  
879 multifactor RNA-Seq experiments with respect to biological variation. *Nucleic Acids Res.* 40,  
880 4288–4297.

881 Menni, C., Kastenmüller, G., Petersen, A.K., Bell, J.T., Psatha, M., Tsai, P.C., Gieger, C.,

882 Schulz, H., Erte, I., John, S., et al. (2013). Metabolomic markers reveal novel pathways of ageing  
883 and early development in human populations. *Int. J. Epidemiol.* *42*, 1111–1119.

884 Minet, A.D., and Gaster, M. (2012). Cultured senescent myoblasts derived from human vastus  
885 lateralis exhibit normal mitochondrial ATP synthesis capacities with correlating concomitant  
886 ROS production while whole cell ATP production is decreased. *Biogerontology* *13*, 277–285.

887 Mitchell, W.K., Phillips, B.E., Williams, J.P., Rankin, D., Lund, J.N., Wilkinson, D.J., Smith, K.,  
888 and Atherton, P.J. (2015). The impact of delivery profile of essential amino acids upon skeletal  
889 muscle protein synthesis in older men: Clinical efficacy of pulse vs. bolus supply. *Am. J.*  
890 *Physiol. - Endocrinol. Metab.* *309*, E450–E457.

891 Pavlidou, T., Rosina, M., Fuoco, C., Gerini, G., Gargioli, C., Castagnoli, L., and Cesareni, G.  
892 (2017). Regulation of myoblast differentiation by metabolic perturbations induced by metformin.  
893 *PLoS One* *12*.

894 Polymenis, M., and Aramayo, R. (2015). Translate to divide: control of the cell cycle by protein  
895 synthesis. *Microb. Cell* *2*, 94–104.

896 Riddle, E.S., Bender, E.L., and Thalacker-Mercer, A.E. (2018a). Expansion capacity of human  
897 muscle progenitor cells differs by age, sex, and metabolic fuel preference. *Am. J. Physiol. - Cell*  
898 *Physiol.* *315*, C643–C652.

899 Riddle, E.S., Bender, E.L., and Thalacker-Mercer, A. (2018b). Transcript profile distinguishes  
900 variability in human myogenic progenitor cell expansion capacity. *Physiol. Genomics*.

901 Rodgers, J.T., King, K.Y., Brett, J.O., Cromie, M.J., Charville, G.W., Maguire, K.K., Brunson,  
902 C., Mastey, N., Liu, L., Tsai, C.-R., et al. (2014). mTORC1 controls the adaptive transition of  
903 quiescent stem cells from G0 to G(Alert). *Nature* *509*, 393–396.

904 Schmidt, E.K., Clavarino, G., Ceppi, M., and Pierre, P. (2009). SUnSET, a nonradioactive

905 method to monitor protein synthesis. *Nat. Methods* 6, 275–277.

906 Seale, P., Sabourin, L.A., Girgis-Gabardo, A., Mansouri, A., Gruss, P., and Rudnicki, M.A.

907 (2000). Pax7 is required for the specification of myogenic satellite cells. *Cell*.

908 Sekhar, R. V., Patel, S.G., Guthikonda, A.P., Reid, M., Balasubramanyam, A., Taffet, G.E., and

909 Jahoor, F. (2011). Deficient synthesis of glutathione underlies oxidative stress in aging and can

910 be corrected by dietary cysteine and glycine supplementation. *Am. J. Clin. Nutr.* 94, 847–853.

911 Sidrauski, C., McGeachy, A.M., Ingolia, N.T., and Walter, P. (2015). The small molecule ISRIB

912 reverses the effects of eIF2 $\alpha$  phosphorylation on translation and stress granule assembly. *Elife*

913 2015.

914 Sinha, M., Jang, Y.C., Oh, J., Khong, D., Wu, E.Y., Manohar, R., Miller, C., Regalado, S.G.,

915 Loffredo, F.S., Pancoast, J.R., et al. (2014). Restoring systemic GDF11 levels reverses age-

916 related dysfunction in mouse skeletal muscle. *Science* (80-. ).

917 Sousa-Victor, P., Gutarra, S., García-Prat, L., Rodriguez-Ubreva, J., Ortet, L., Ruiz-Bonilla, V.,

918 Jardí, M., Ballestar, E., González, S., Serrano, A.L., et al. (2014). Geriatric muscle stem cells

919 switch reversible quiescence into senescence. *Nature* 506, 316–321.

920 Sun, K., Wu, Z., Ji, Y., and Wu, G. (2016). Glycine Regulates Protein Turnover by Activating

921 Protein Kinase B/Mammalian Target of Rapamycin and by Inhibiting MuRF1 and Atrogin-1

922 Gene Expression in C2C12 Myoblasts. *J. Nutr.* 146, 2461–2467.

923 Wallace, M., Green, C.R., Roberts, L.S., Lee, Y.M., McCarville, J.L., Sanchez-Gurmaches, J.,

924 Meurs, N., Gengatharan, J.M., Hover, J.D., Phillips, S.A., et al. (2018). Enzyme promiscuity

925 drives branched-chain fatty acid synthesis in adipose tissues. *Nat. Chem. Biol.* 14, 1021–1031.

926 Woeller, C.F., Anderson, D.D., Szebenyi, D.M.E., and Stover, P.J. (2007). Evidence for small

927 ubiquitin-like modifier-dependent nuclear import of the thymidylate biosynthesis pathway. *J.*

928 Biol. Chem. 282, 17623–17631.

929 Xu, X., Wilschut, K.J., Kouklis, G., Tian, H., Hesse, R., Garland, C., Sbitany, H., Hansen, S.,

930 Seth, R., Knott, P.D., et al. (2015). Human Satellite Cell Transplantation and Regeneration from

931 Diverse Skeletal Muscles. *Stem Cell Reports* 5, 419–434.

932 Zismanov, V., Chichkov, V., Colangelo, V., Jamet, S., Wang, S., Syme, A., Koromilas, A.E., and

933 Crist, C. (2016). Phosphorylation of eIF2 $\alpha$  is a Translational Control Mechanism Regulating

934 Muscle Stem Cell Quiescence and Self-Renewal. *Cell Stem Cell* 18, 79–90.

935

936

937

938

939

940

941

942

943

944

945

946



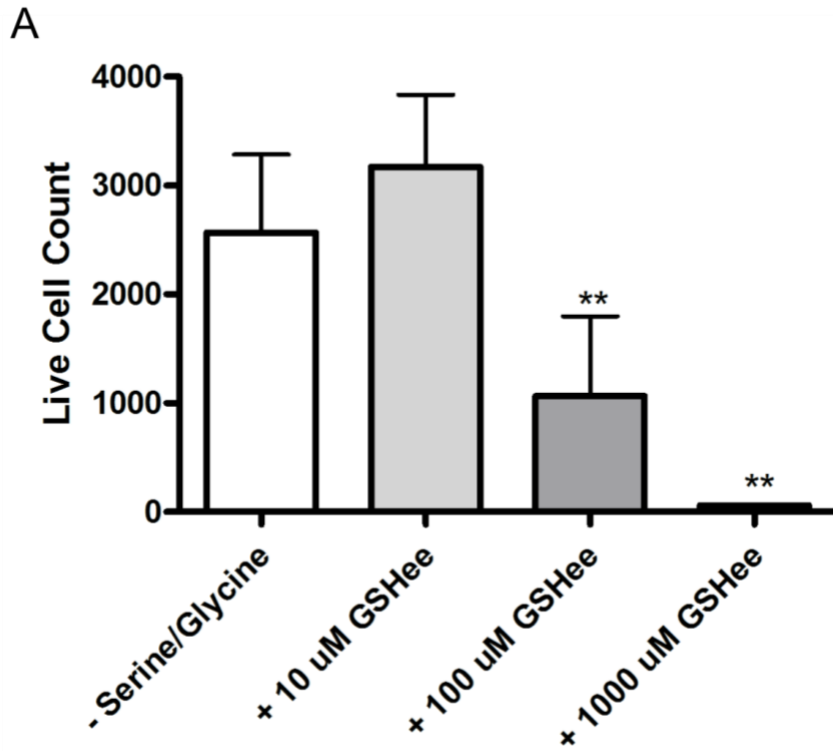

947

948 **Figure S1.** Glutathione ethyl ester is toxic to *hMPCs* at high doses

949

950 A) Live cell count after 5 days of GSHee (glutathione ethyl ester) supplementation in  
951 serine/glycine restricted media.

952 All experiments were repeated with *hMPCs* derived from the same 5 donors. \*\* $P < 0.01$  relative

953 to serine/glycine restricted control. Data are expressed as mean  $\pm$  SD.

954

955

956

957

958

959

A

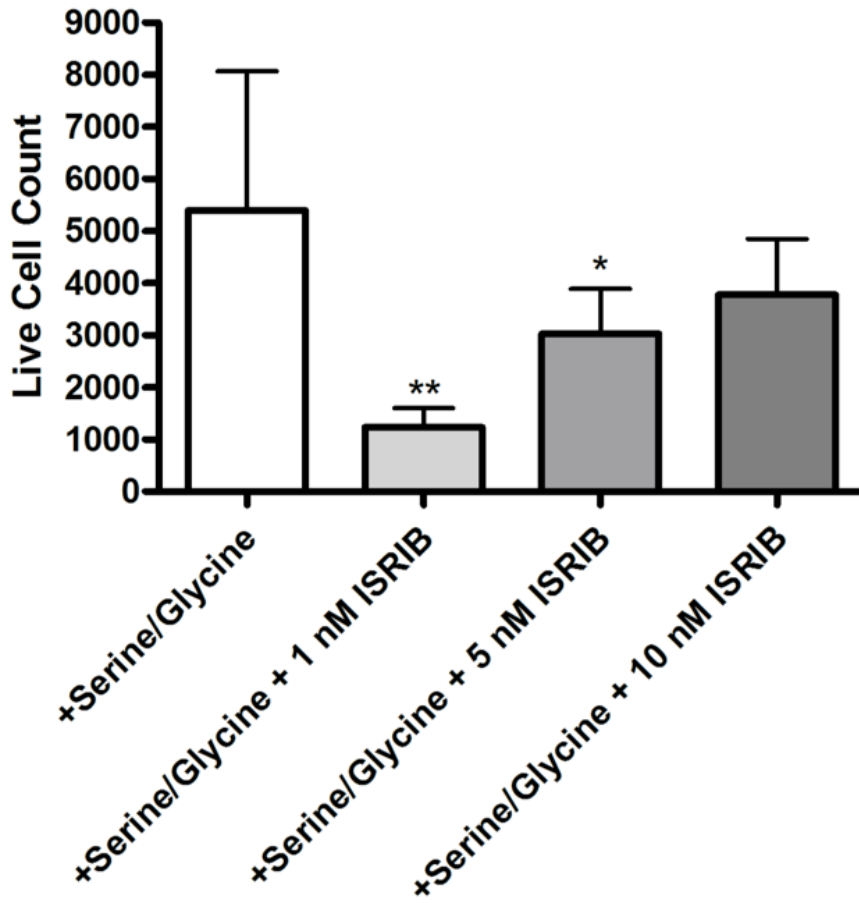

960

961

962

963 **Figure S2.** ISRIB reduces *hMPC* number in the presence of serine/glycine

964

965 A) Live cell count after 5 days of ISRIB supplementation in serine/glycine replete media.

966 All experiments were repeated with *hMPC*s derived from the same 5 donors. \*\*P<0.01,

967 \*\*P<0.01 relative to serine/glycine replete control. Data are expressed as mean ± SD.

968

969

970 **Supplementary Tables**

971 **Supplementary Table 1.** List of Differentially Expressed Genes in *hMPCs* Cultured in

972 Serine/Glycine Replete and Serine/Glycine Restricted Media
